# Supplementary material for: Thymosin β4 increases cardiac cell proliferation, cell engraftment, and the reparative potency of human induced-pluripotent stem cell-derived cardiomyocytes in a porcine model of acute myocardial infarction
Source: PubMed Central journal article supplement (PMC8315077; doi:10.7150/thno.56757), 2021-06-26
Supplement: thnov11p7879s1.pdf [file thnov11p7879s1.pdf]

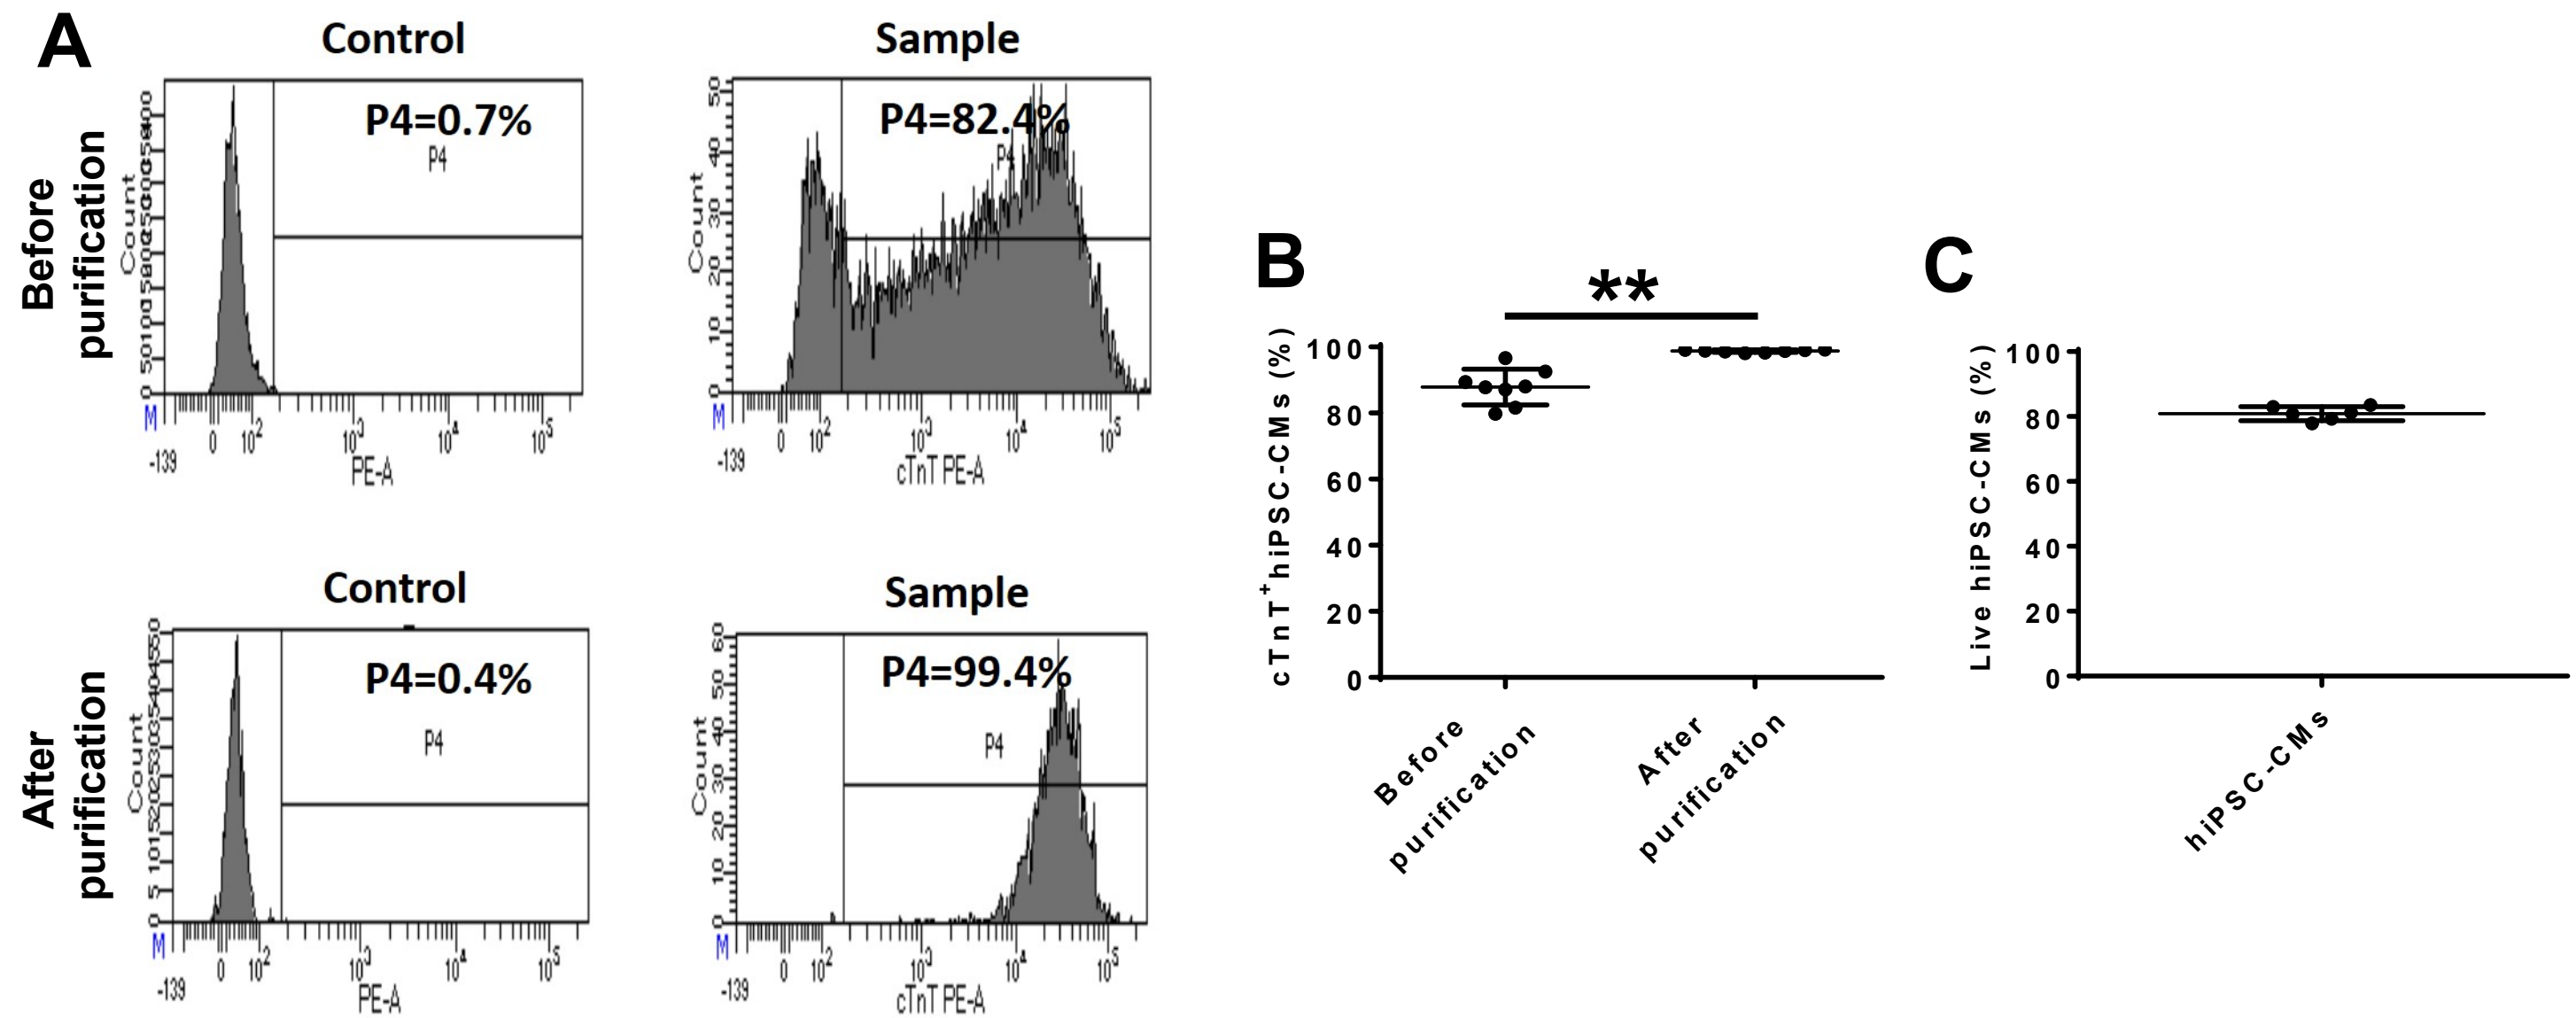

**Figure S1: Purity and viability of hiPSC-CMs.** (A) Representative flow cytometry images of cTnT<sup>+</sup>hiPSC-CMs before and after purification. (B) Quantification of cTnT<sup>+</sup>hiPSC-CM before and after purification. (n = 8) (Independent T-test. \*\*: p < 0.01). (C) Percentage of viable hiPSC-CMs after recovered from liquid nitrogen. (n = 6). Values are presented as the means ± SD.

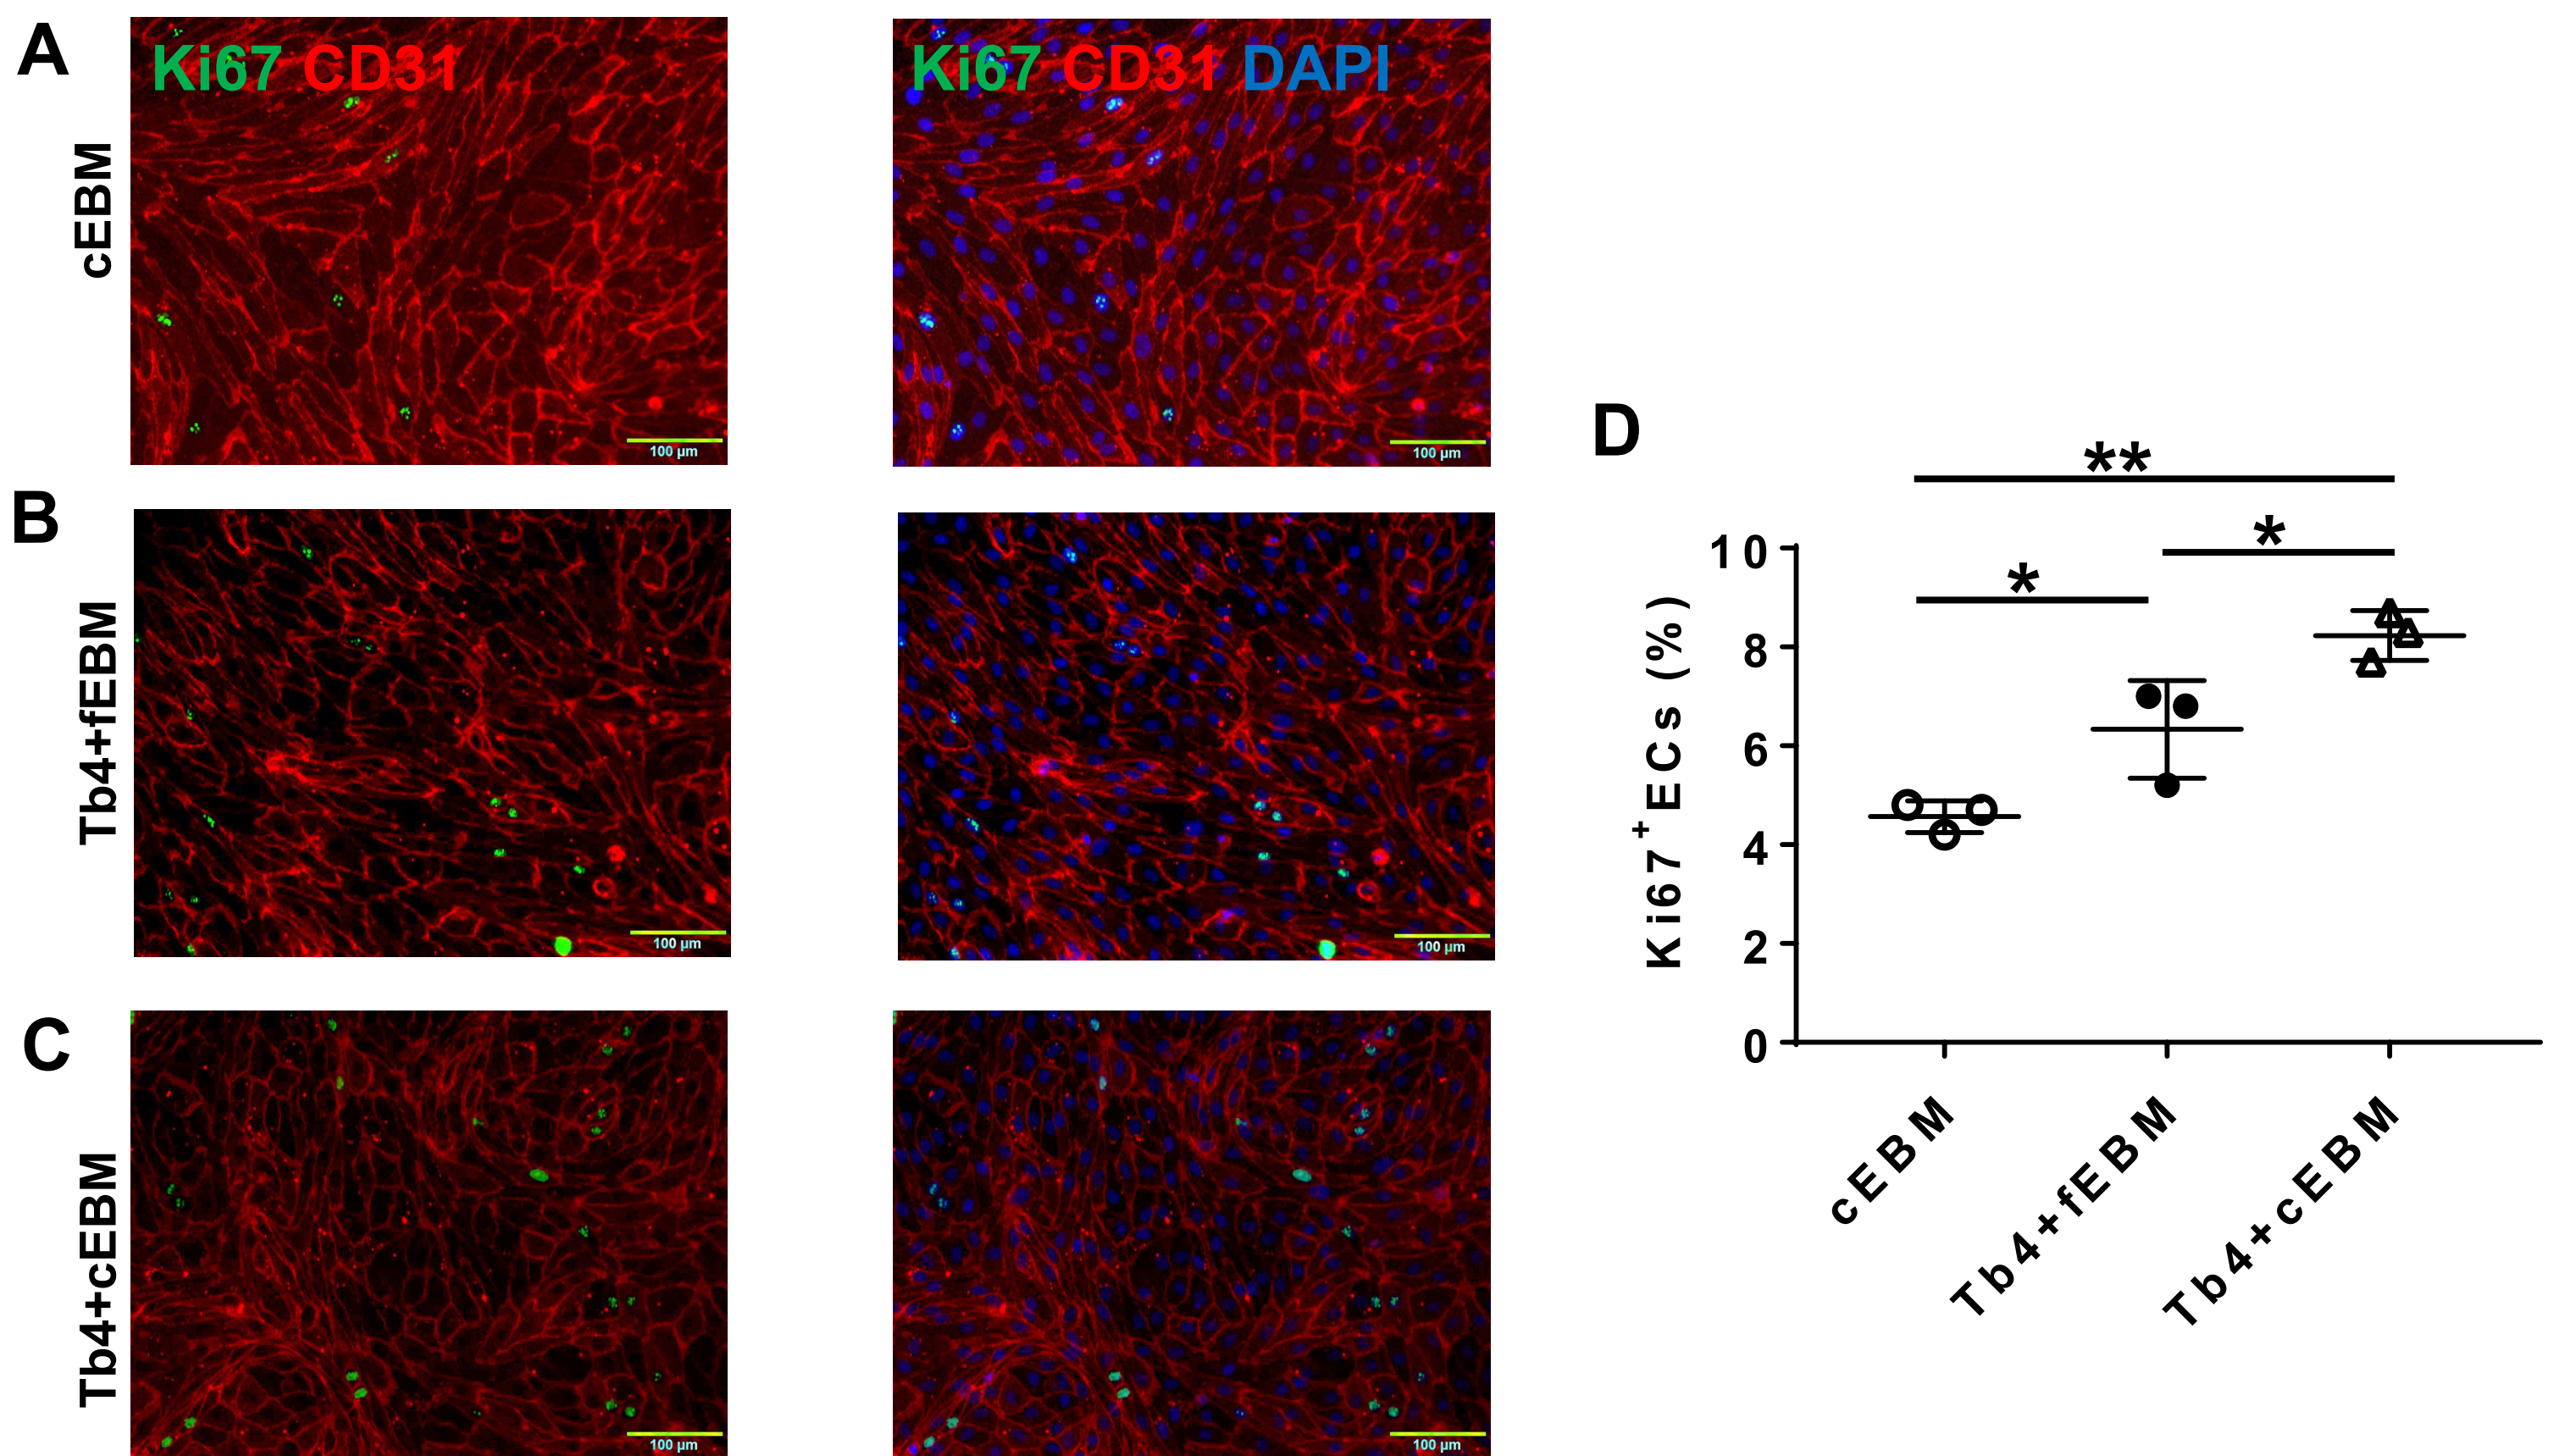

**Figure S2.** Representative images of hiPSC-ECs cultured in either hiPSC-CM conditioned endothelial basal medium (cEBM) (**A**), or fresh endothelial basal medium (fEBM) supplemented with 600 ng / mL Tb4 (**B**), or cEBM supplemented with 600 ng / mL Tb4 (**C**) for 48 h, and then cells were co-stained for expression of Ki67 and CD31 proteins. (**D**) Quantification of hiPSC-ECs expressing Ki67. (Bar = 100  $\mu$ m). (n = 3. Independent T-test. \*: p < 0.05, \*\*: p < 0.01). Values are presented as the means  $\pm$  SD.



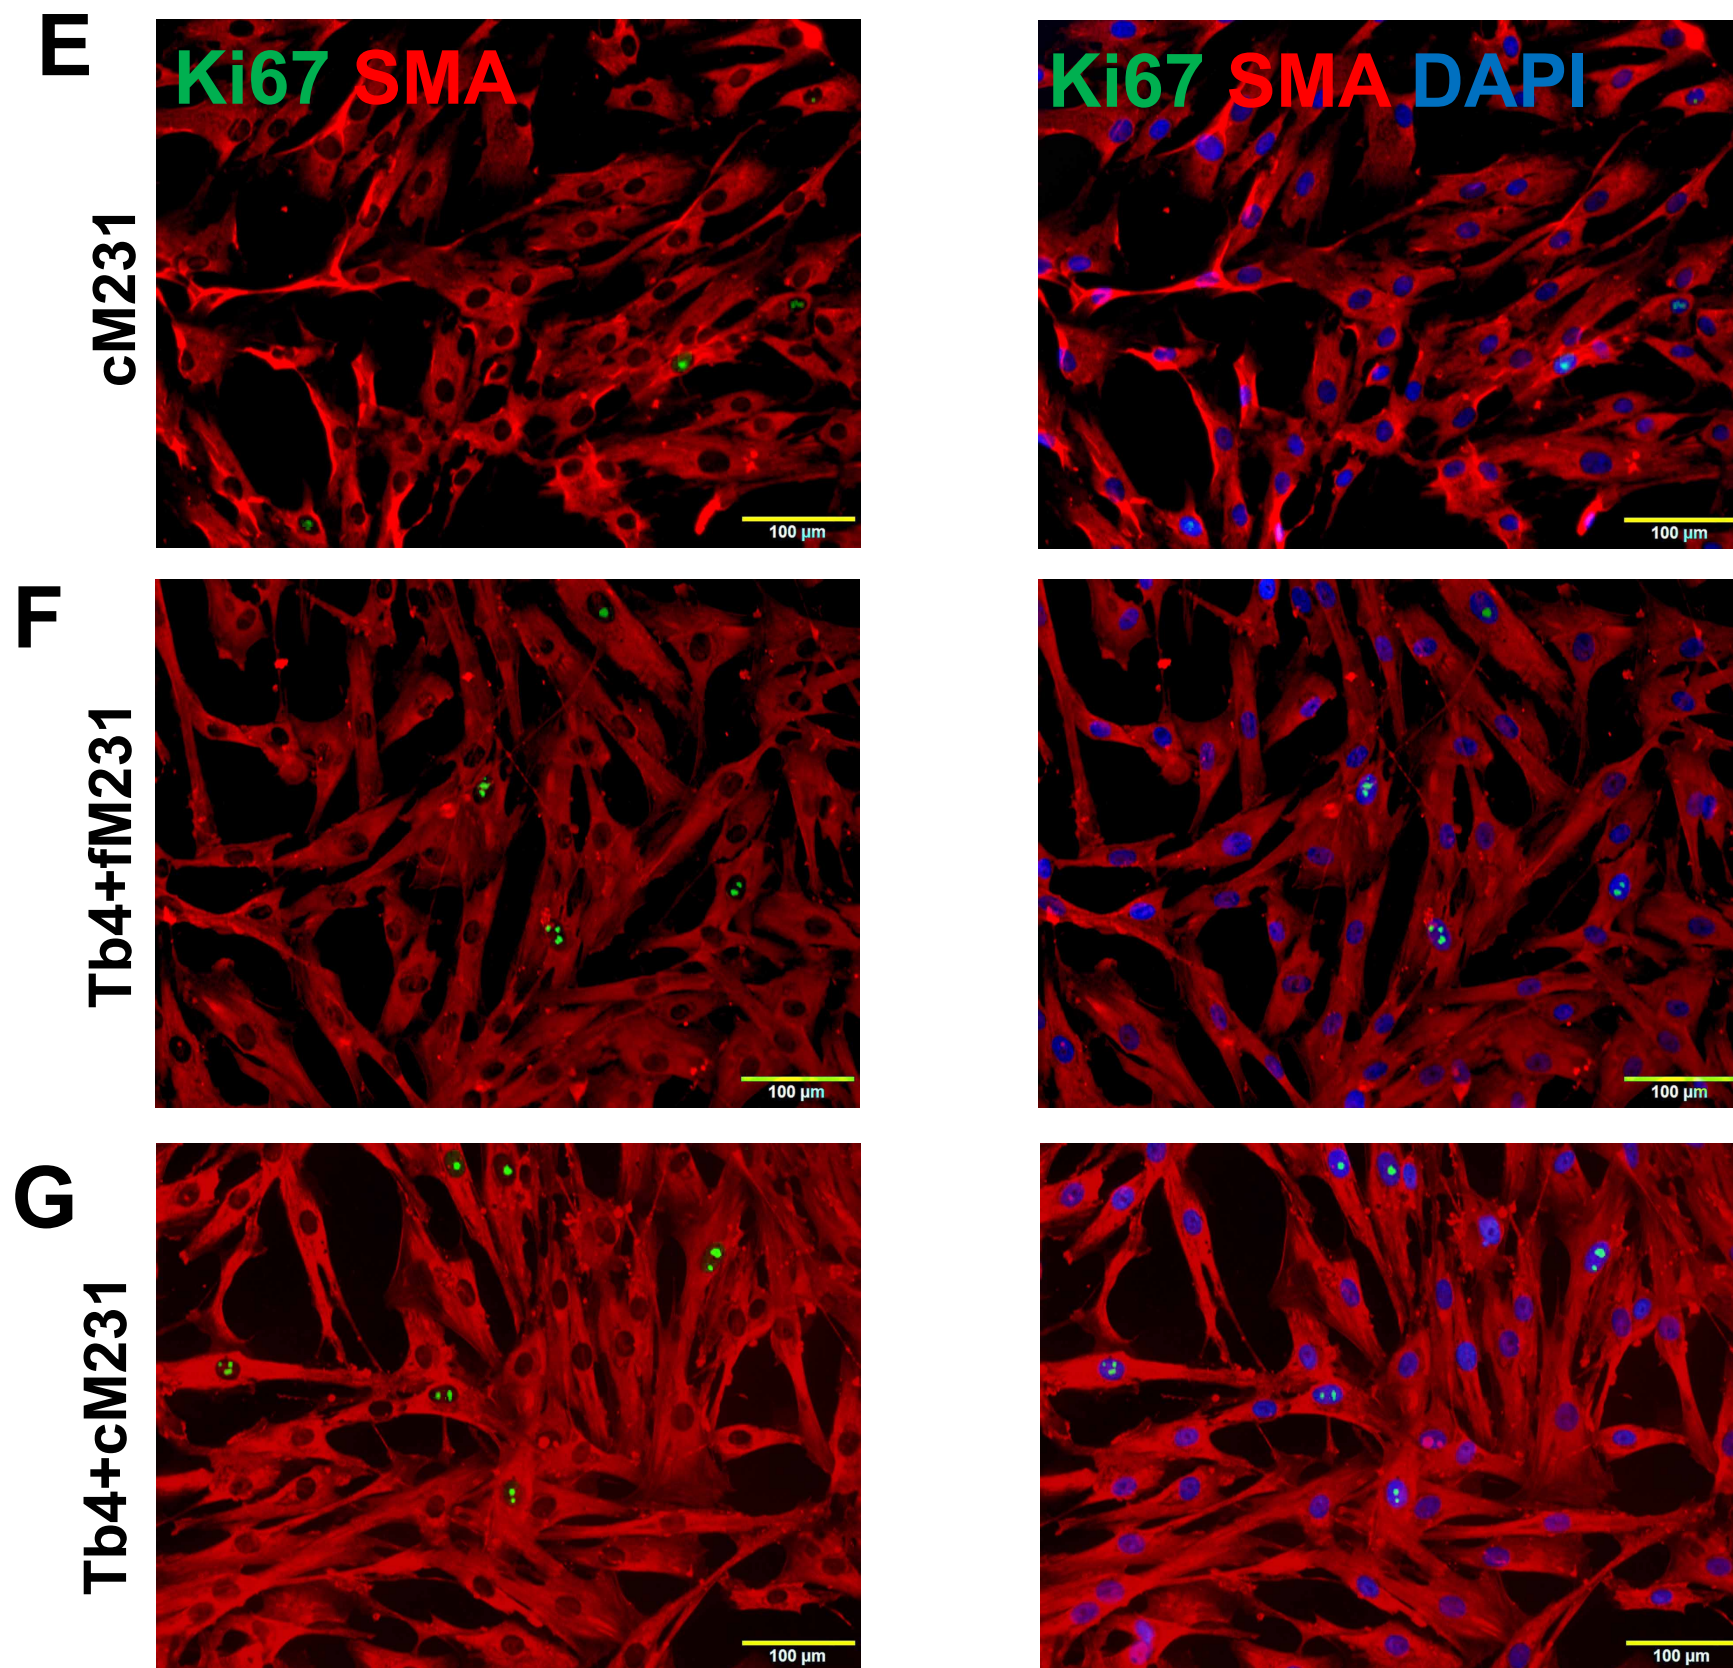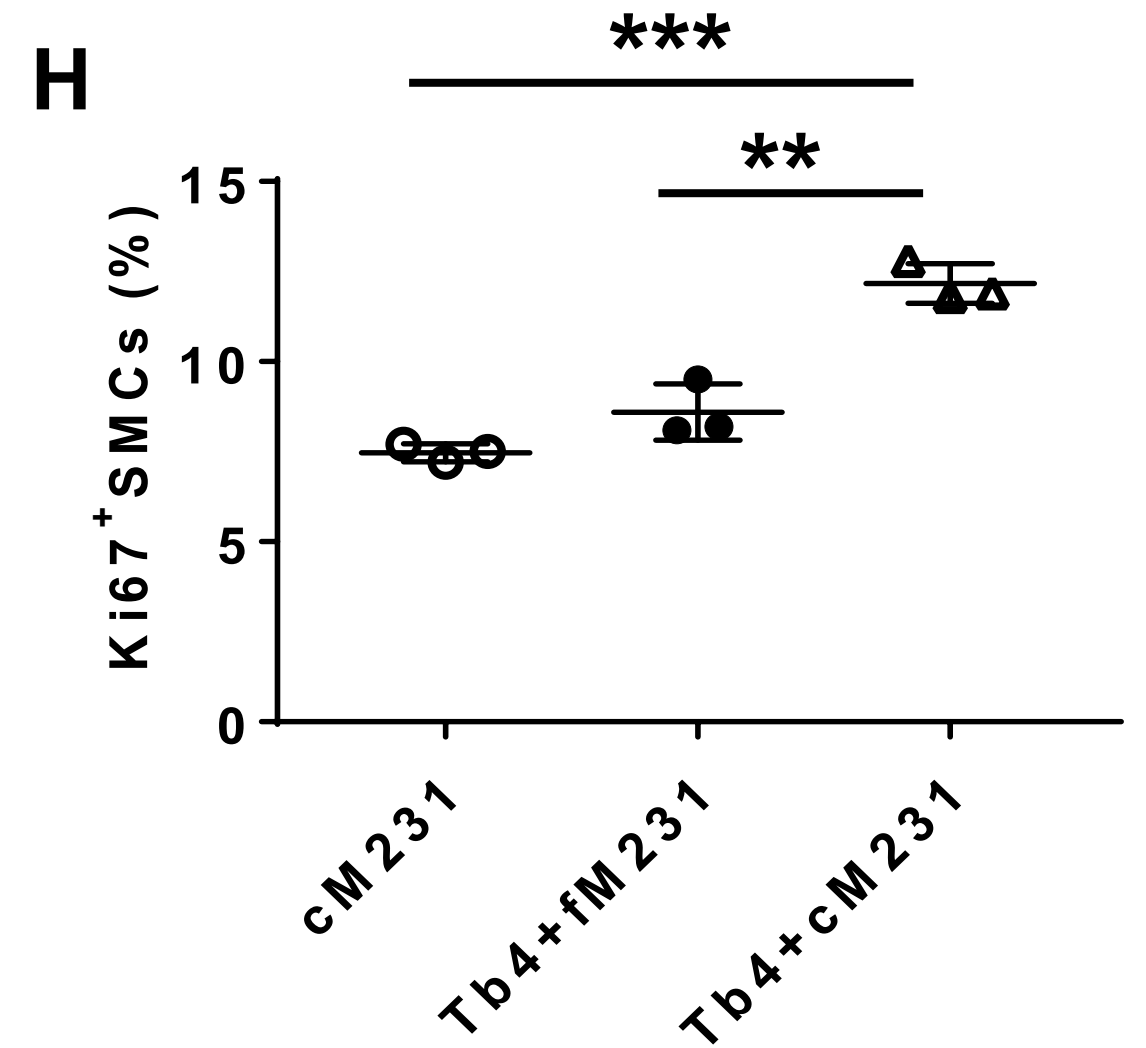

**Figure S2.** Representative images of smooth muscle cells (SMCs) cultured in either hiPSC-CM conditioned M231 medium (cM231) (E), or fresh M231 medium (fM231) supplemented with 600 ng / mL Tb4 (F), or cM231 supplemented with 600 ng / mL (G) for 24 h, and then cells were co-stained for expression of Ki67 and smooth muscle actin (SMA) proteins. (H) Quantification of SMCs expressing Ki67. (Bar = 100 μm). (n = 3. Independent T-test. \*\*: p < 0.01, \*\*\*: P < 0.001). Values are presented as the means ± SD.

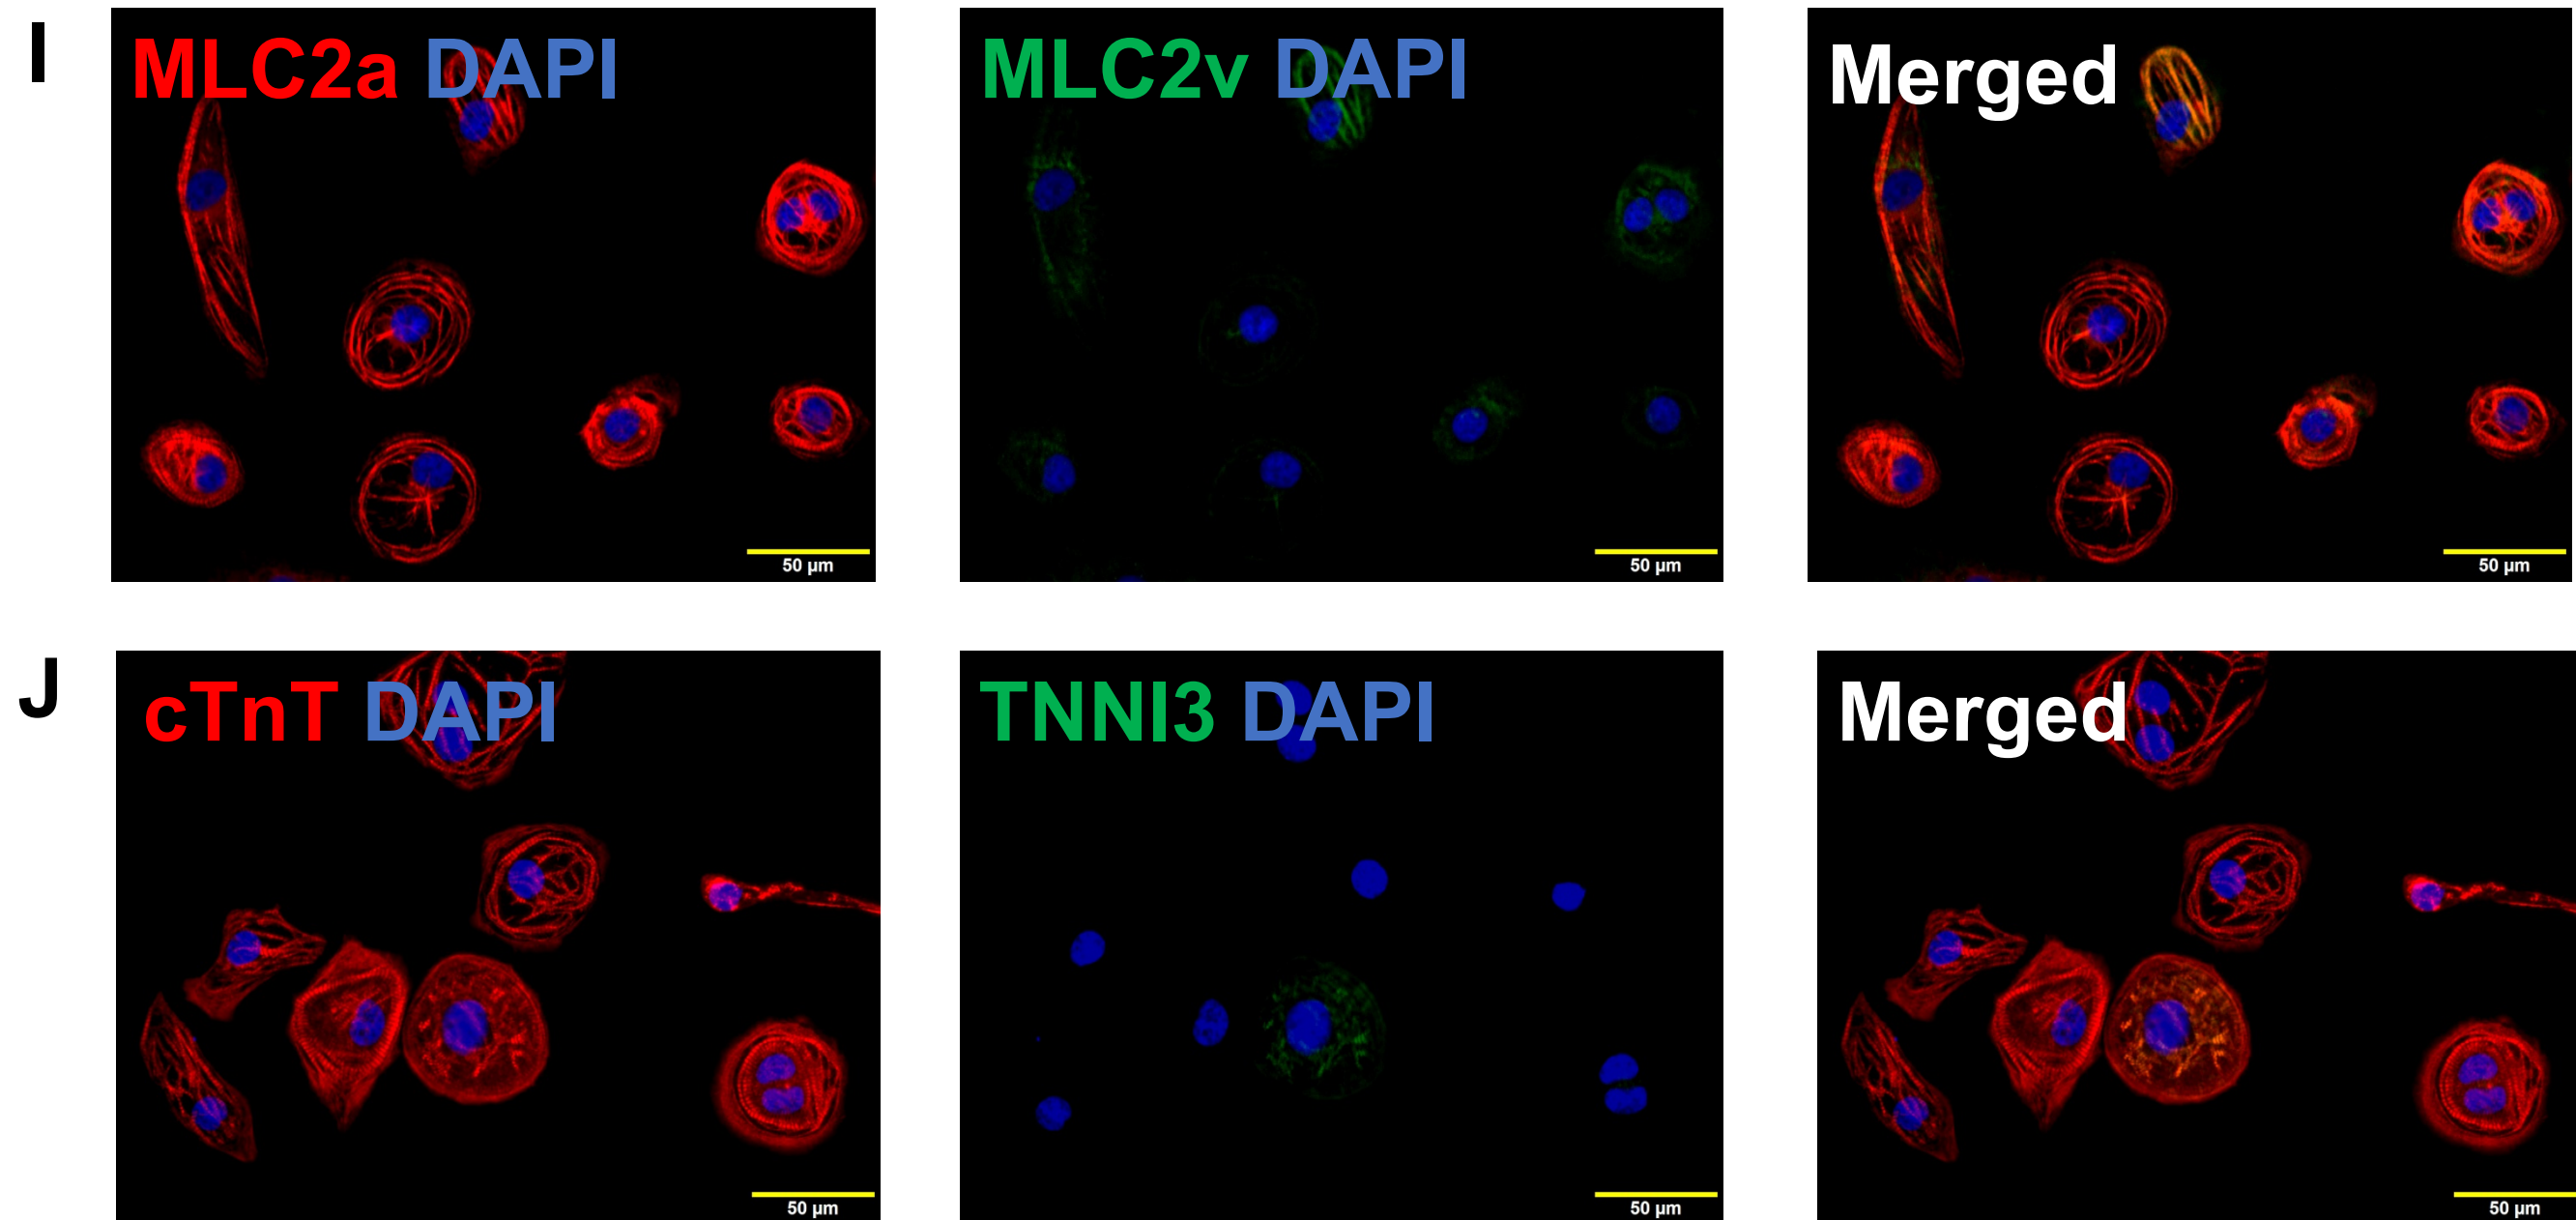

**Figure S2.** Dual immunostaining of hiPSC-CMs for protein expression of atrial isoform myosin light chain 2 (MLC2a) and ventricular isoform myosin light chain 2 (MLC2v) (I). Protein expressions of cardiac troponin T (cTnT) and troponin I isoform 3 (TNNI3) in hiPSC-CMs (J). (Bar = 50 μm).

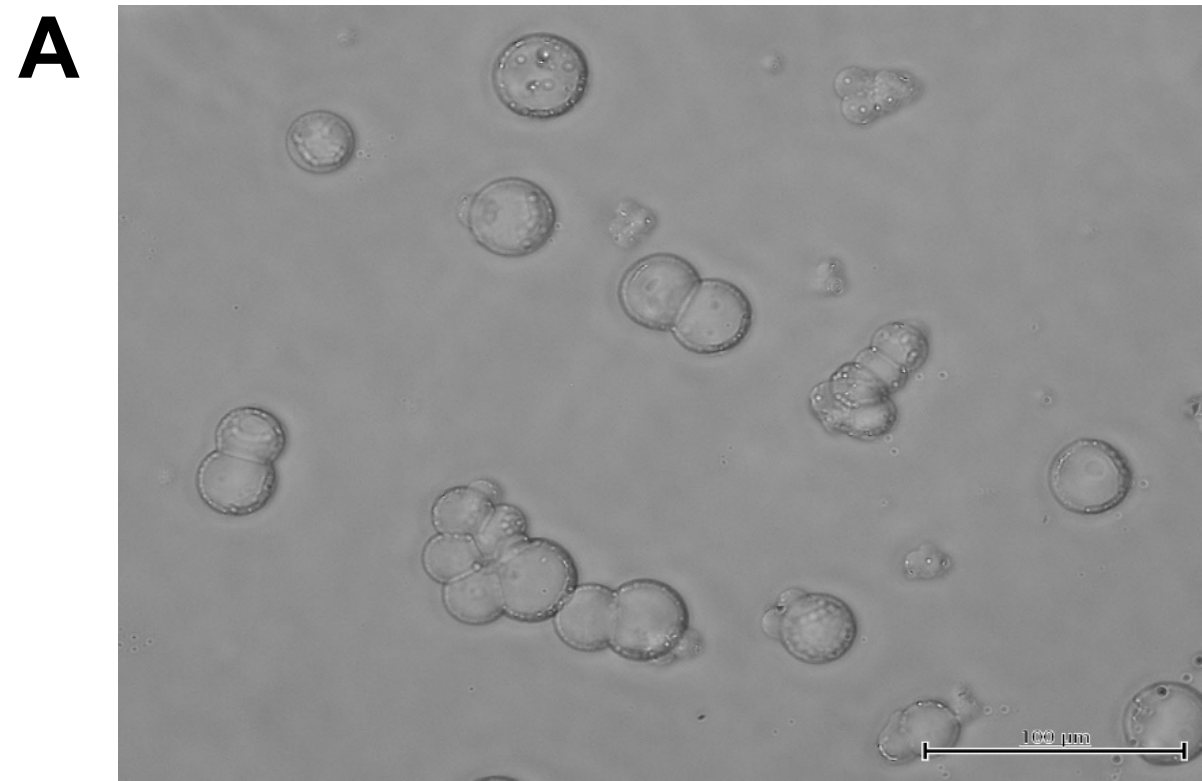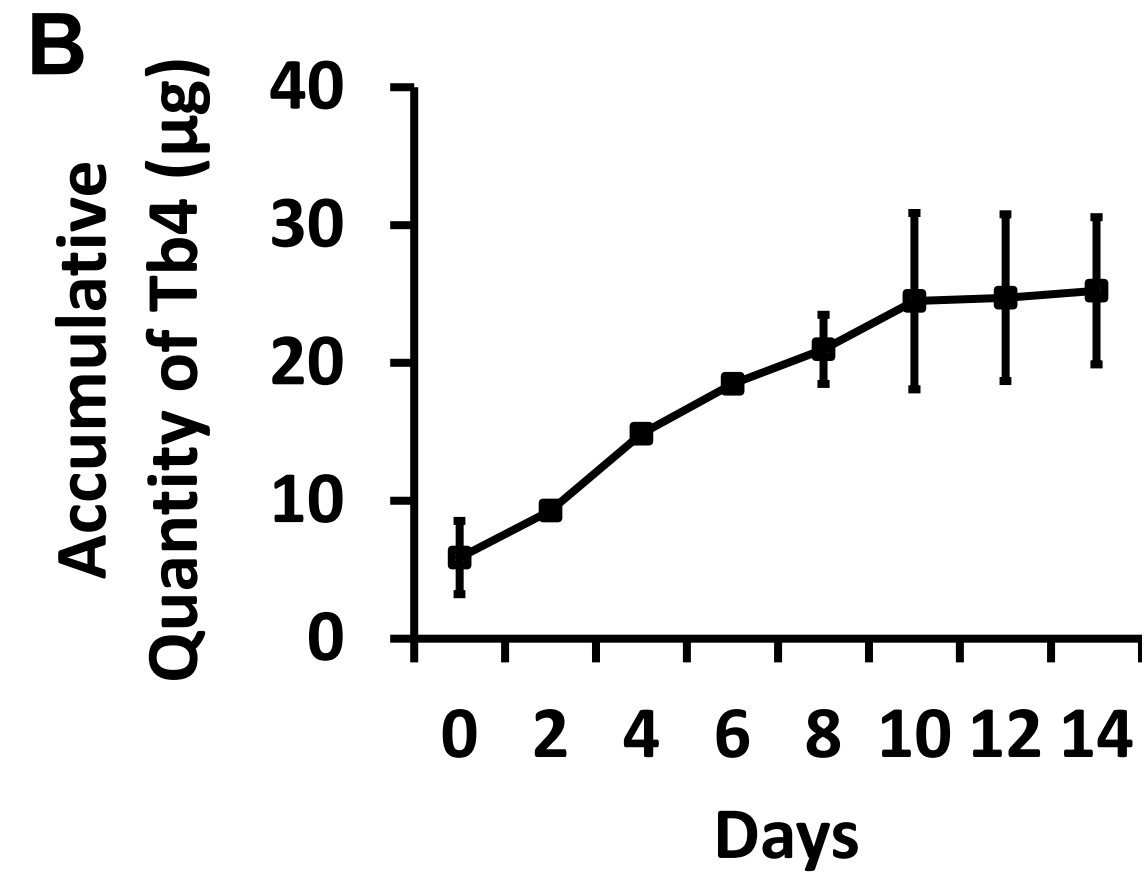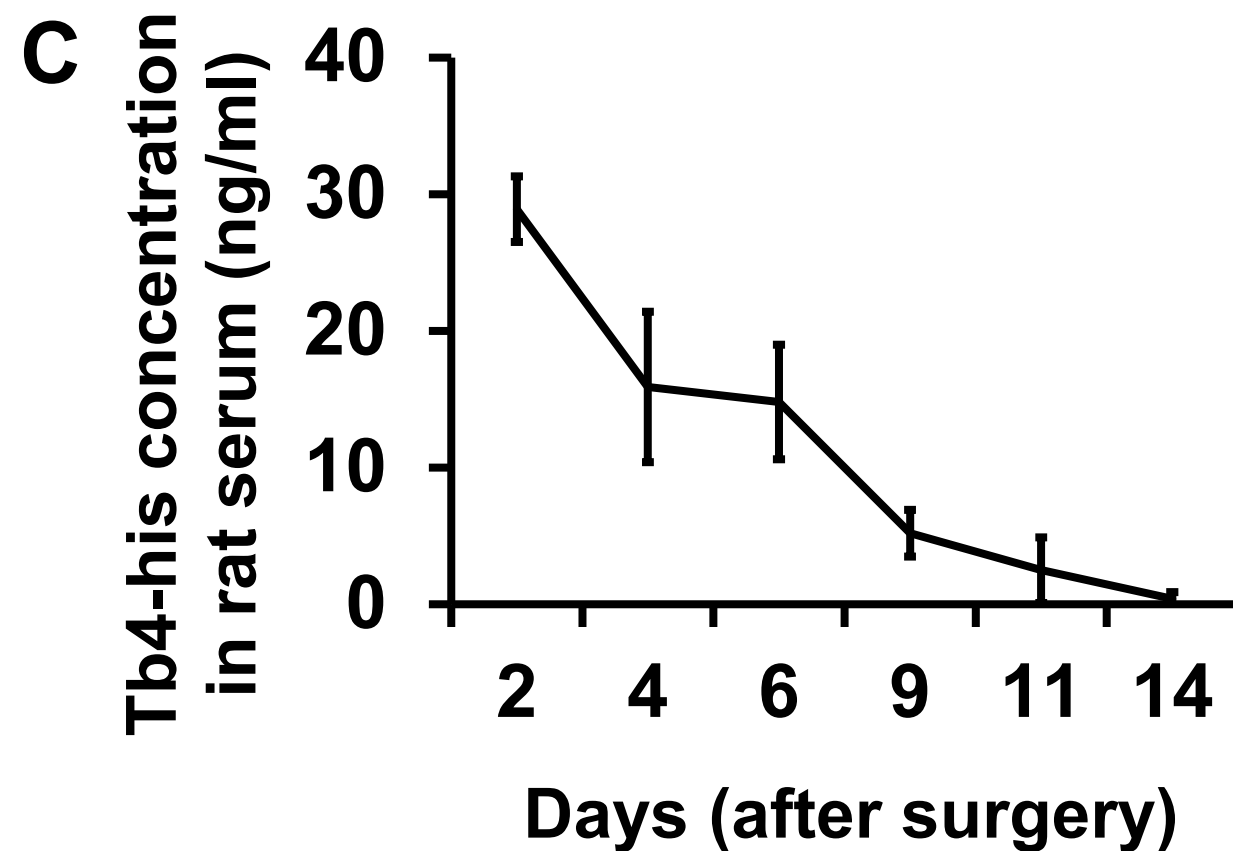

**Figure S3. Gelatin microspheres for controlled release of Tb4.** (A) Typical images of fresh manufactured gelatin microspheres. (Bar = 100  $\mu\text{m}$ ). (B) Accumulative release profile of Tb4 that was loaded into microspheres up to 14 days *in vitro*. (n=2). (C) Tb4-his concentration in rat serum as a function of time *in vivo*. (n=4). Values are presented as the means  $\pm$  SD.



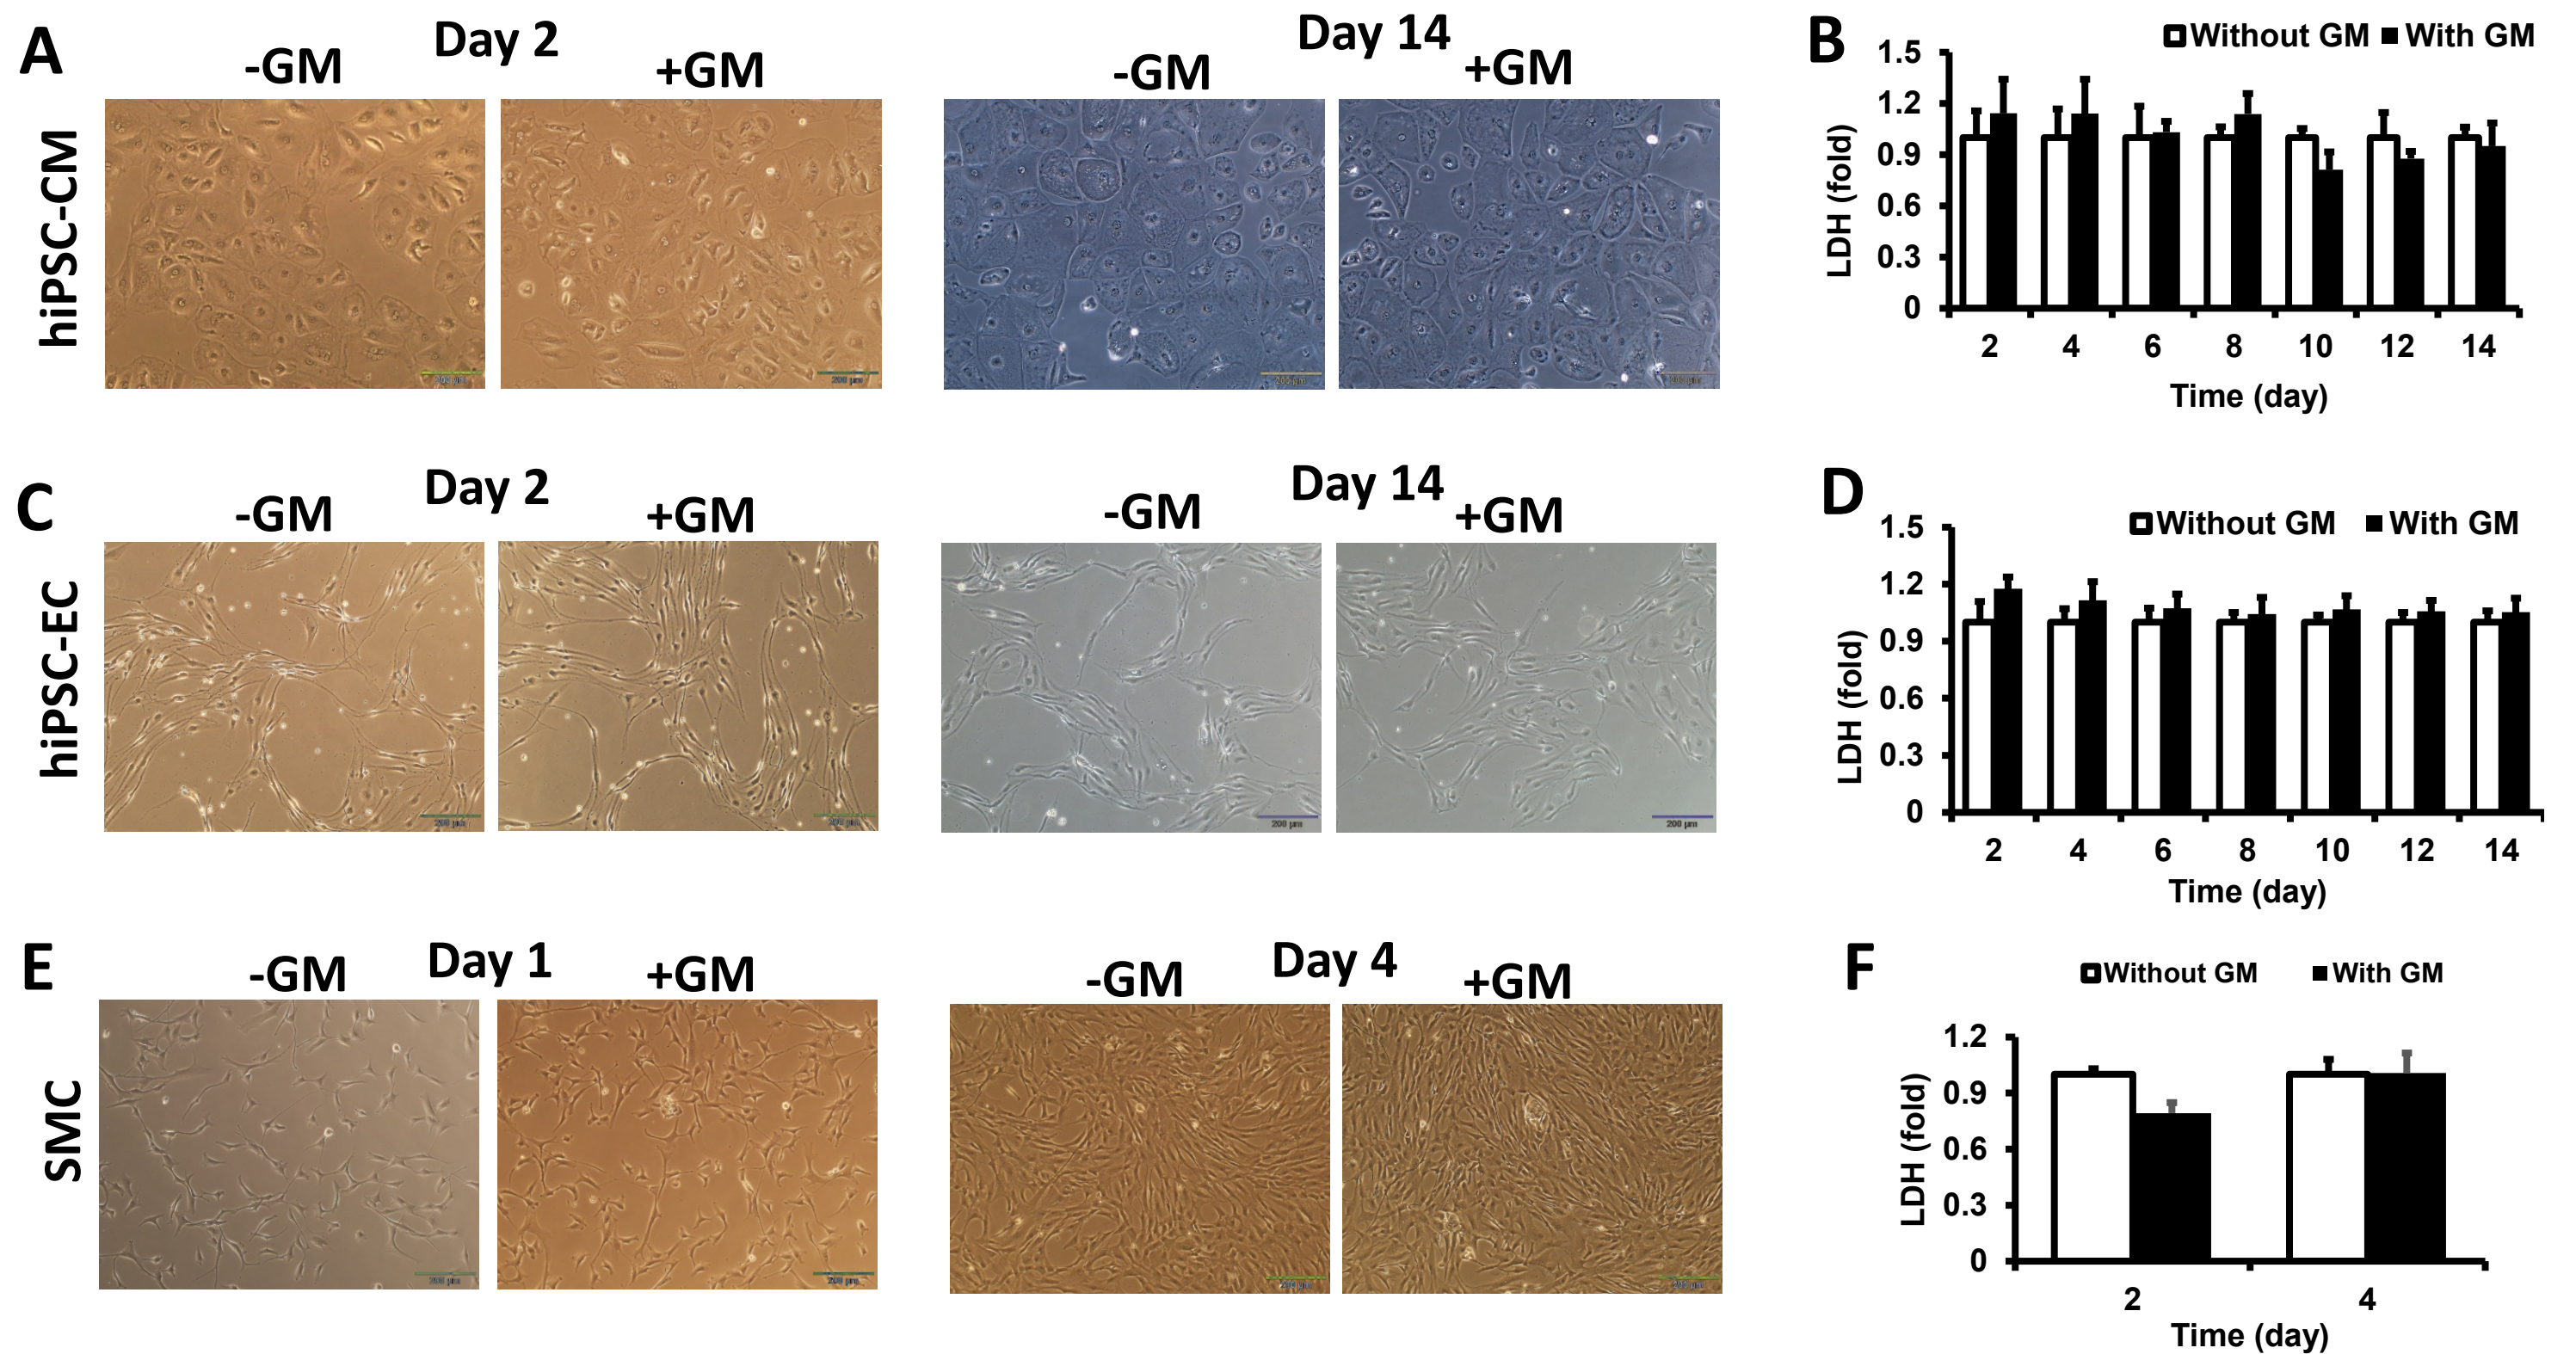

**Figure S4. Tests to determine the toxic effect of gelatin microspheres on cardiac cells. (A)** Morphological profile of hiPSC-CM treated with or without gelatin microspheres (+GM or -GM). **(B)** Lactate dehydrogenase (LDH) concentration in hiPSC-CM supernatant as a function of time. **(C)** Morphological profile of hiPSC-ECs treated with or without gelatin microspheres. **(D)** LDH concentration in hiPSC-EC supernatant as a function of time. **(E)** Morphological profile of human coronary artery SMCs treated with or without gelatin microspheres. **(F)** LDH concentration in hiPSC-EC supernatant as a function of time. (Bar = 200 $\mu$ m. Values are presented as the means  $\pm$  SD).



**A**

**The end  
of systole**

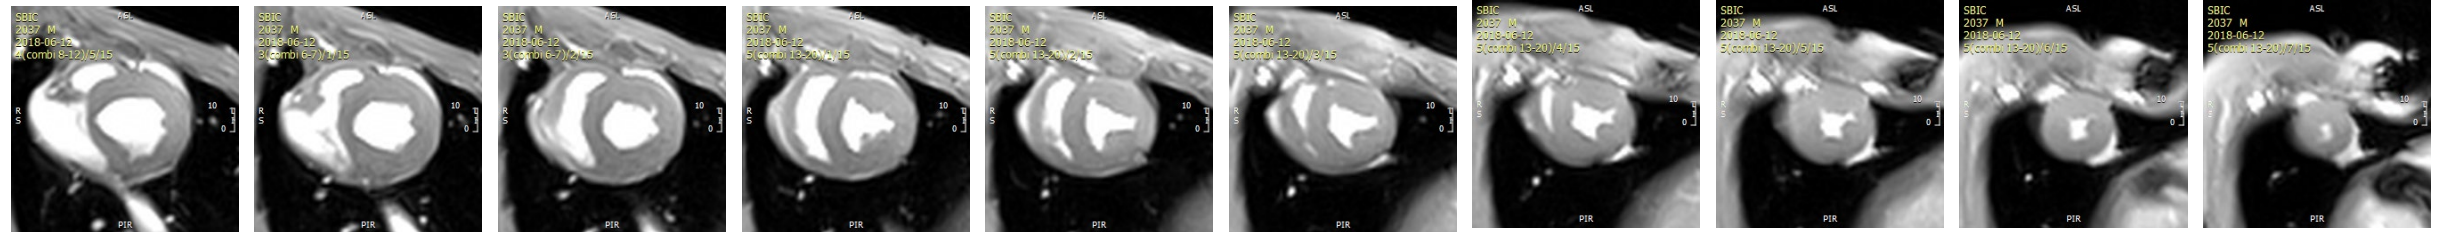

**The end  
of diastole**

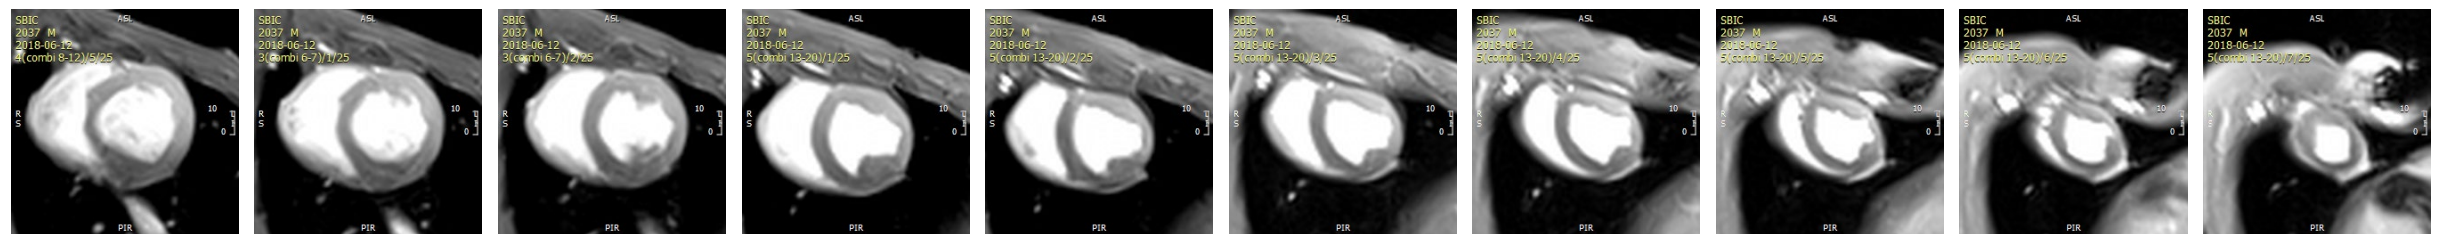

**Figure S5. MRI images of pig hearts for measuring left ventricular ejection fraction (LVEF). (A) Representative images of short-axis left ventricular chamber at the end of systole and the end of diastole in a pig heart of the Sham Group.**

## B1

The end of systole

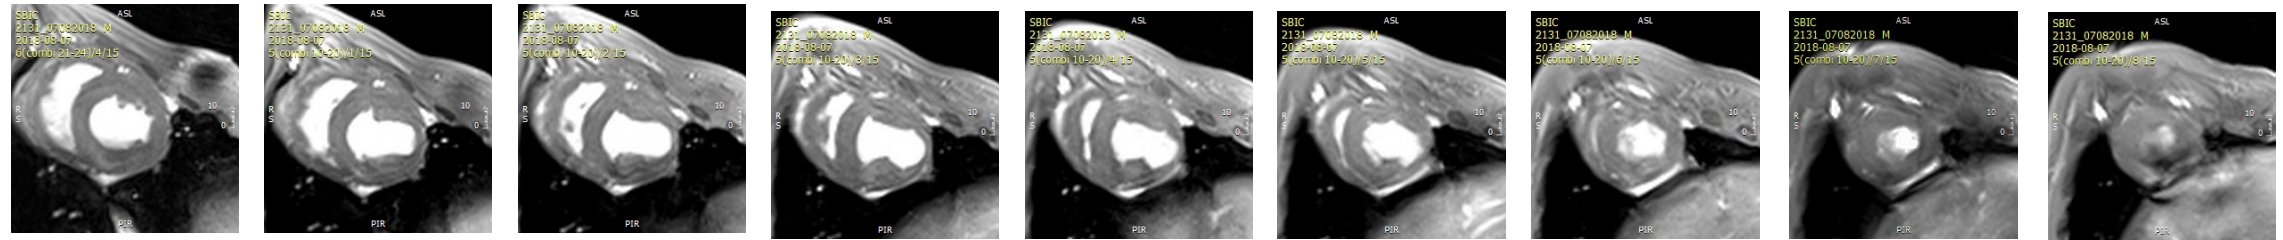

The end of diastole

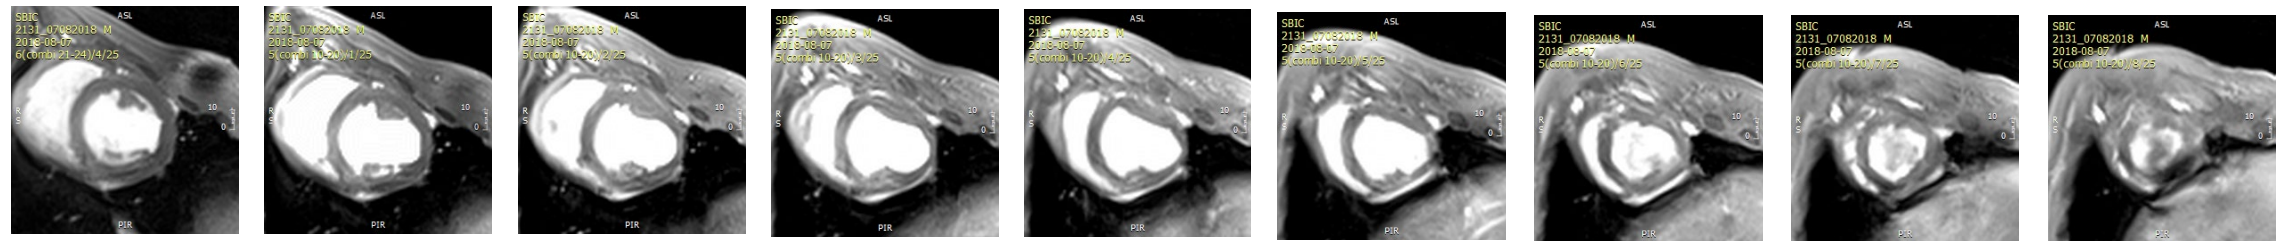

## B2

The end of systole

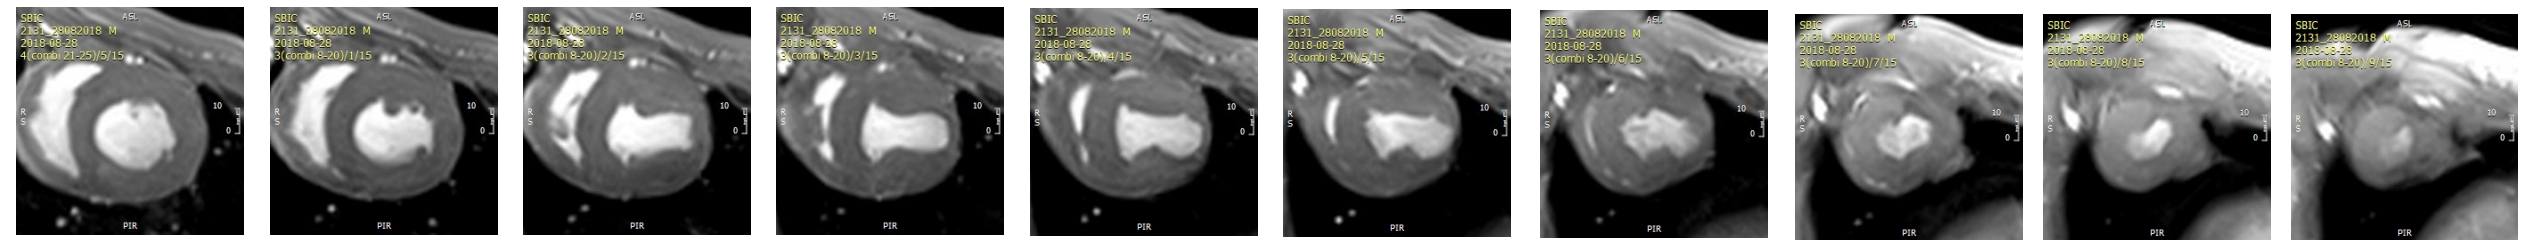

The end of diastole

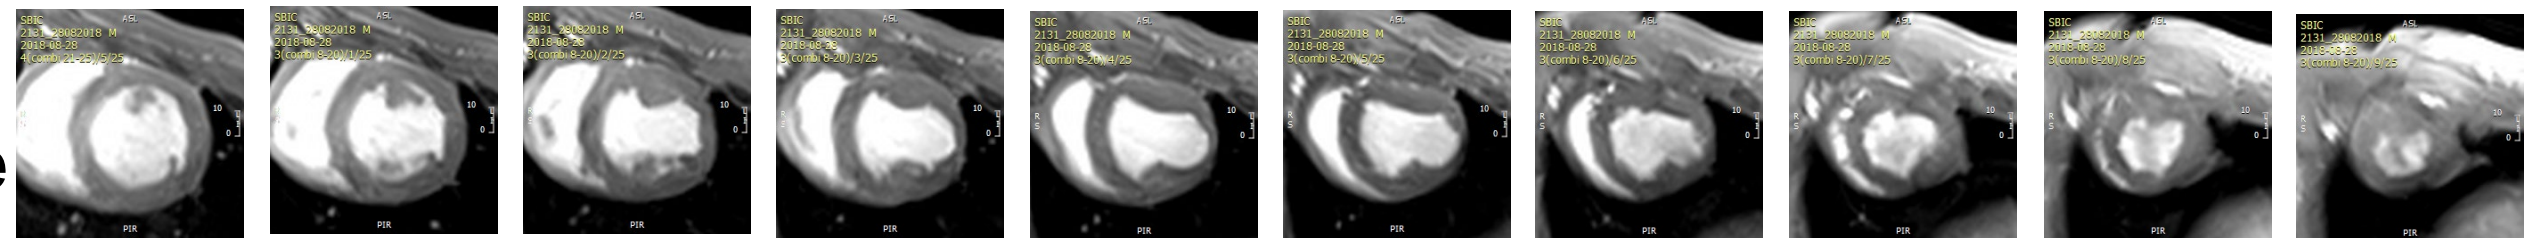

**Figures S5.** Representative images of short-axis left ventricular chamber at the end of systole and the end of diastole in the pig hearts of the MI Group at weeks-1 (**B1**) and -4 (**B2**) after MI and treatment.



# C1

The end of systole

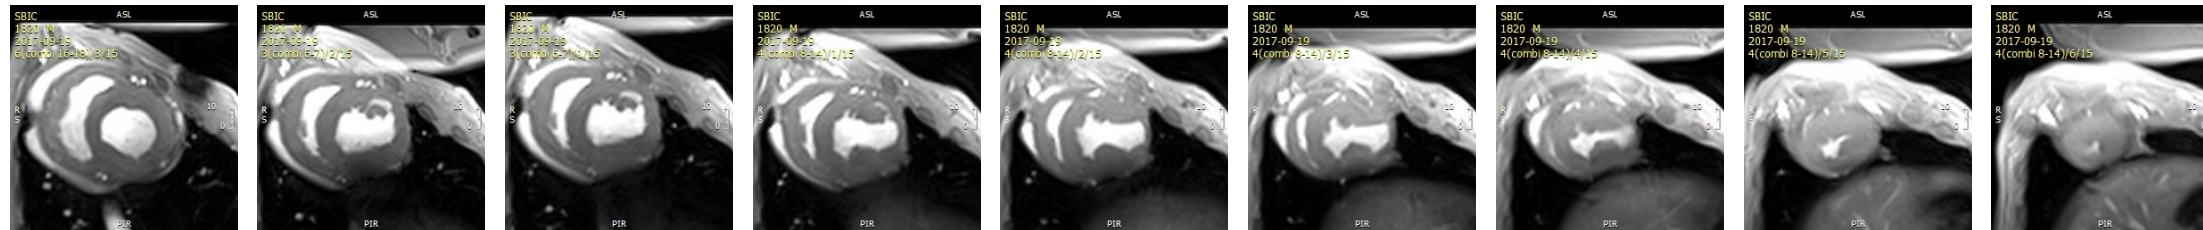

The end of diastole

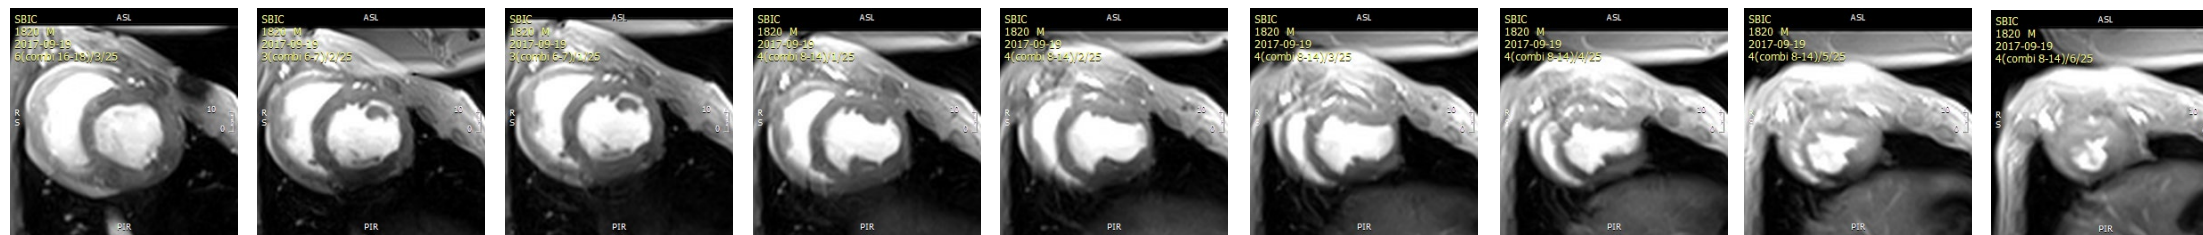

# C2

The end of systole

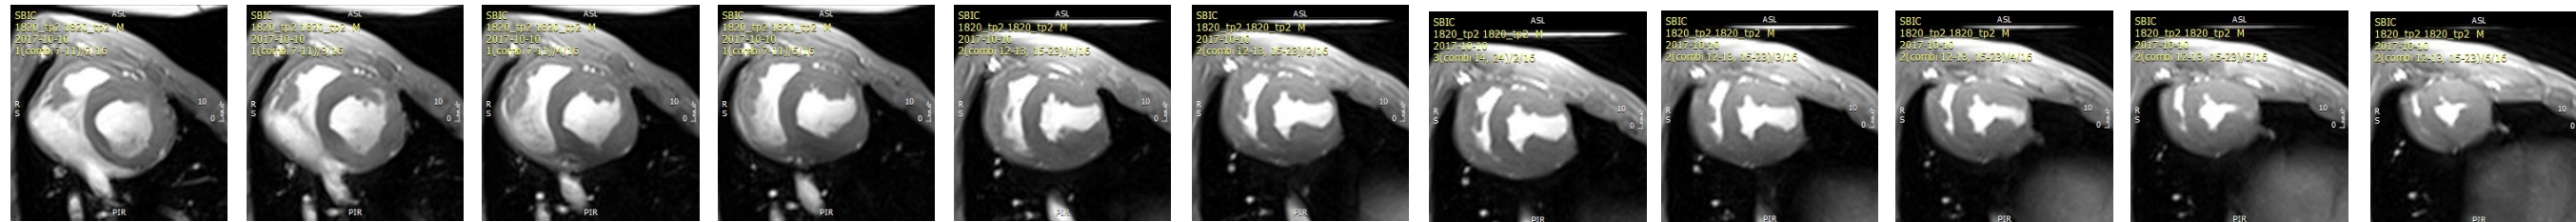

The end of diastole

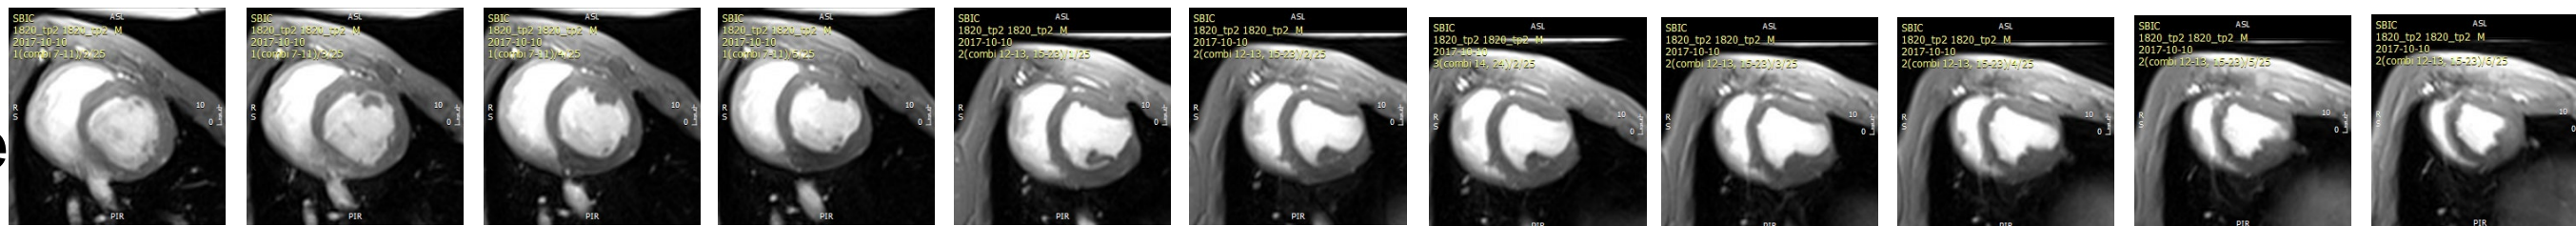

**Figures 5C1&C2.** Representative images of short-axis left ventricular chamber at the end of systole and the end of diastole in pig hearts of the Tb4 Group at weeks-1 (**C1**) and -4 (**C2**) after MI and treatment.



# D1

The end of systole

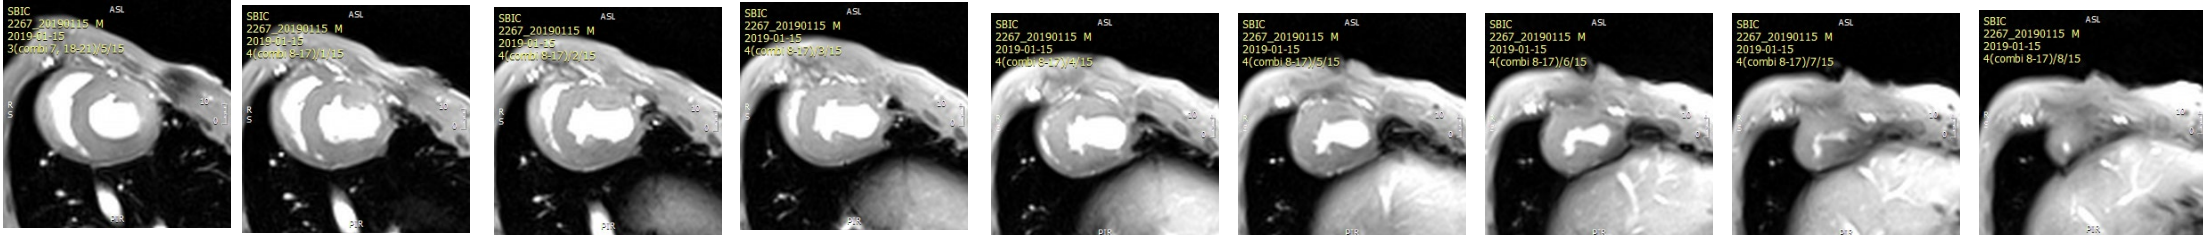

The end of diastole

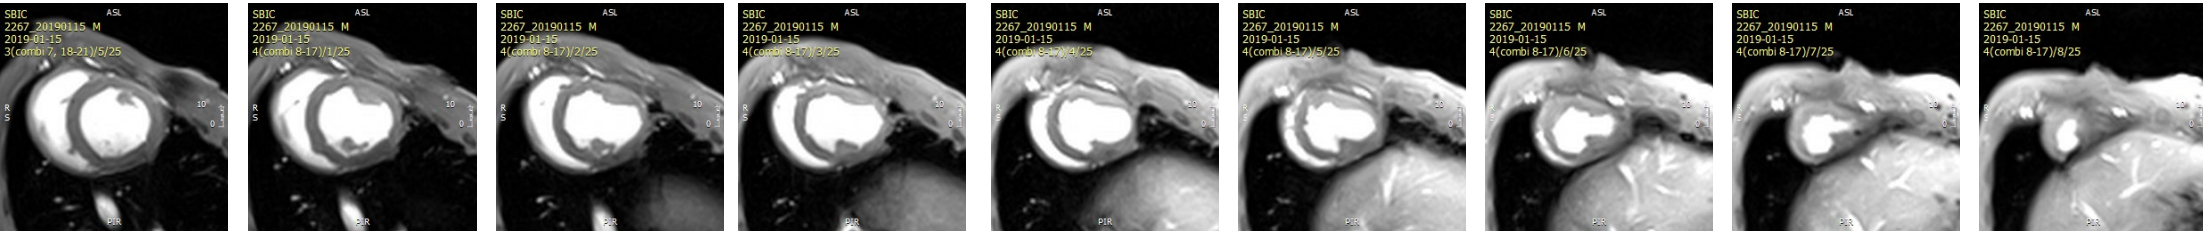

# D2

The end of systole

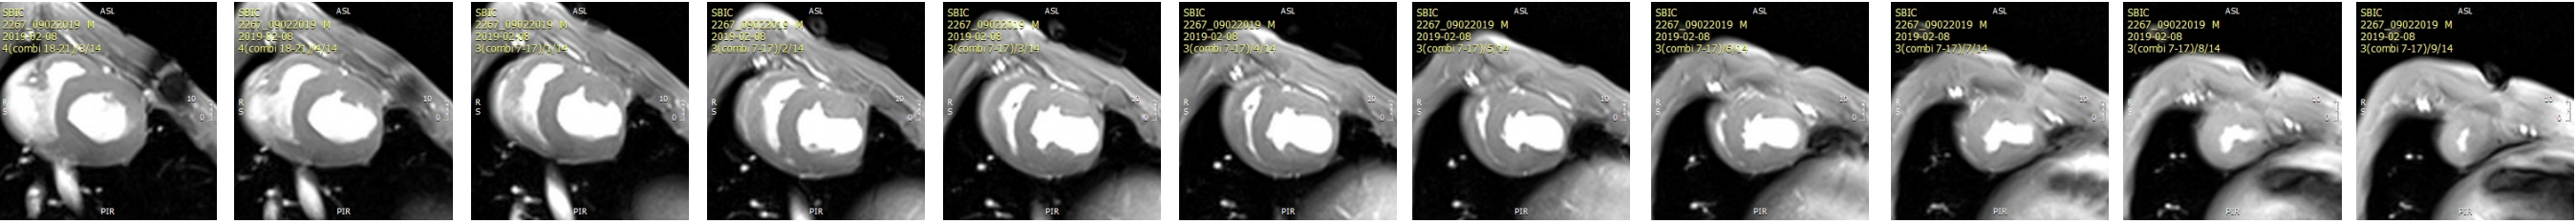

The end of diastole

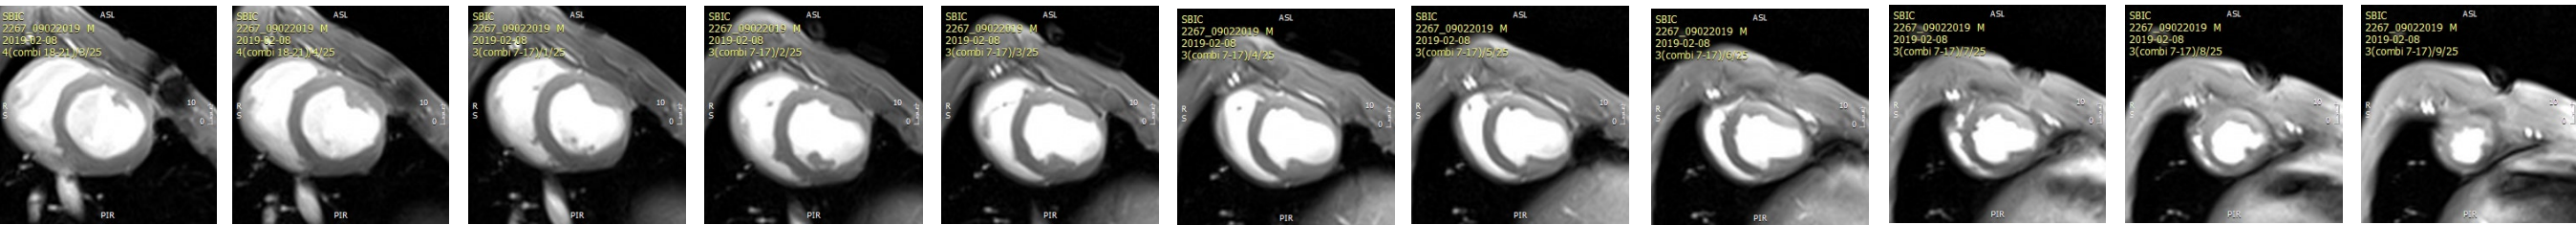

**Figures S5.** Representative images of short-axis left ventricular chamber at the end of systole and the end of diastole in the pig hearts of the CM Group at weeks-1 (**D1**) and -4 (**D2**) after MI and treatment.



**E1**  
The end  
of systole

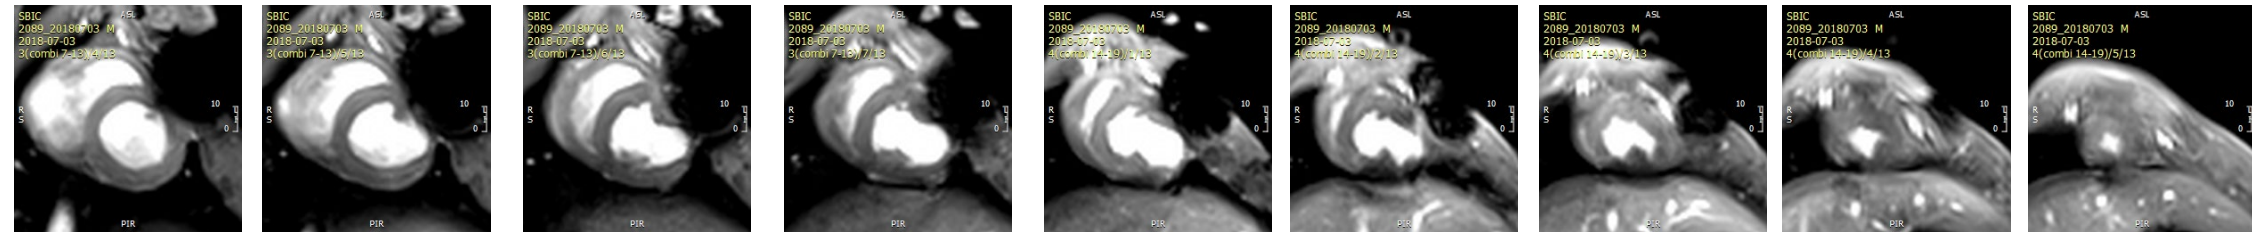

The end  
of diastole

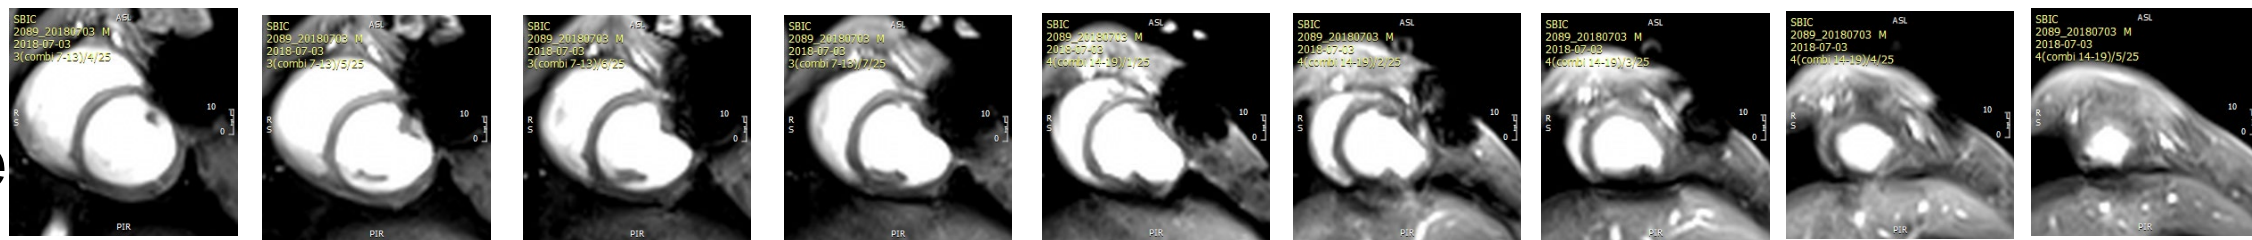

**E2**  
The end  
of systole

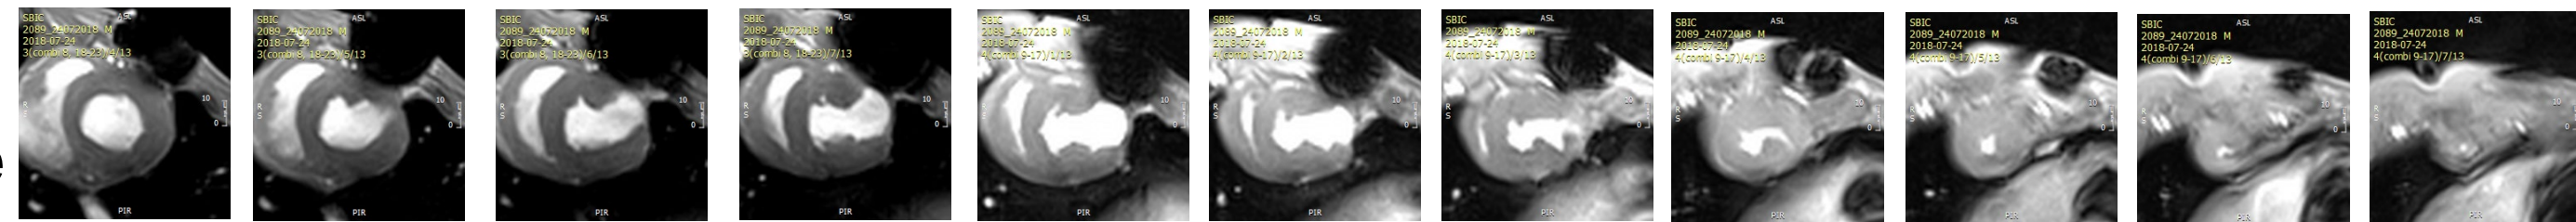

The end  
of diastole

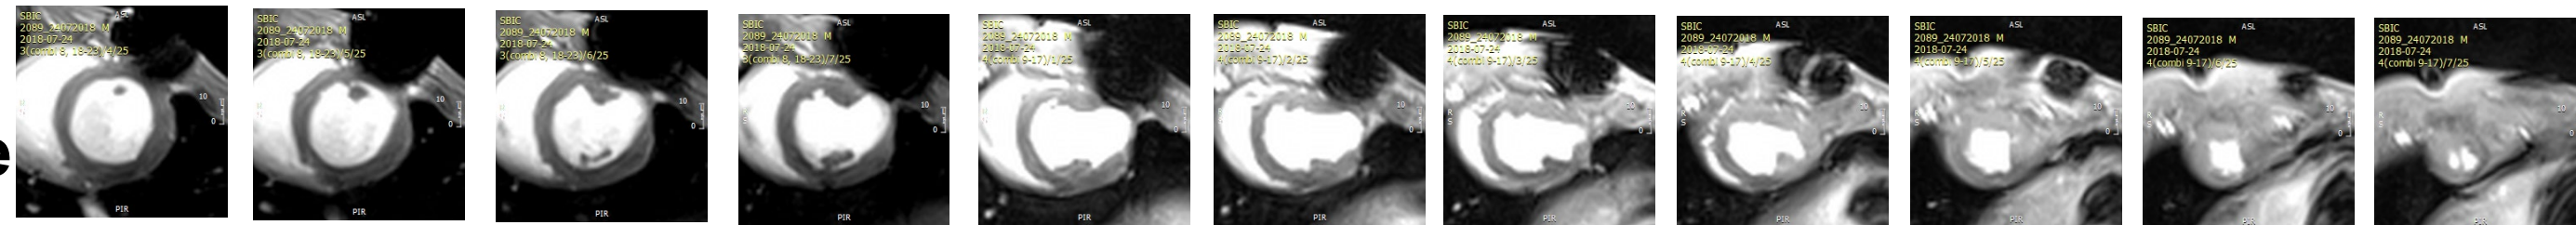

**Figures S5.** Representative images of short-axis left ventricular chamber at the end of systole and the end of diastole in the pig hearts of the Tb4 + CM Group at weeks-1 (**E1**) and -4 (**E2**) after MI and treatment.

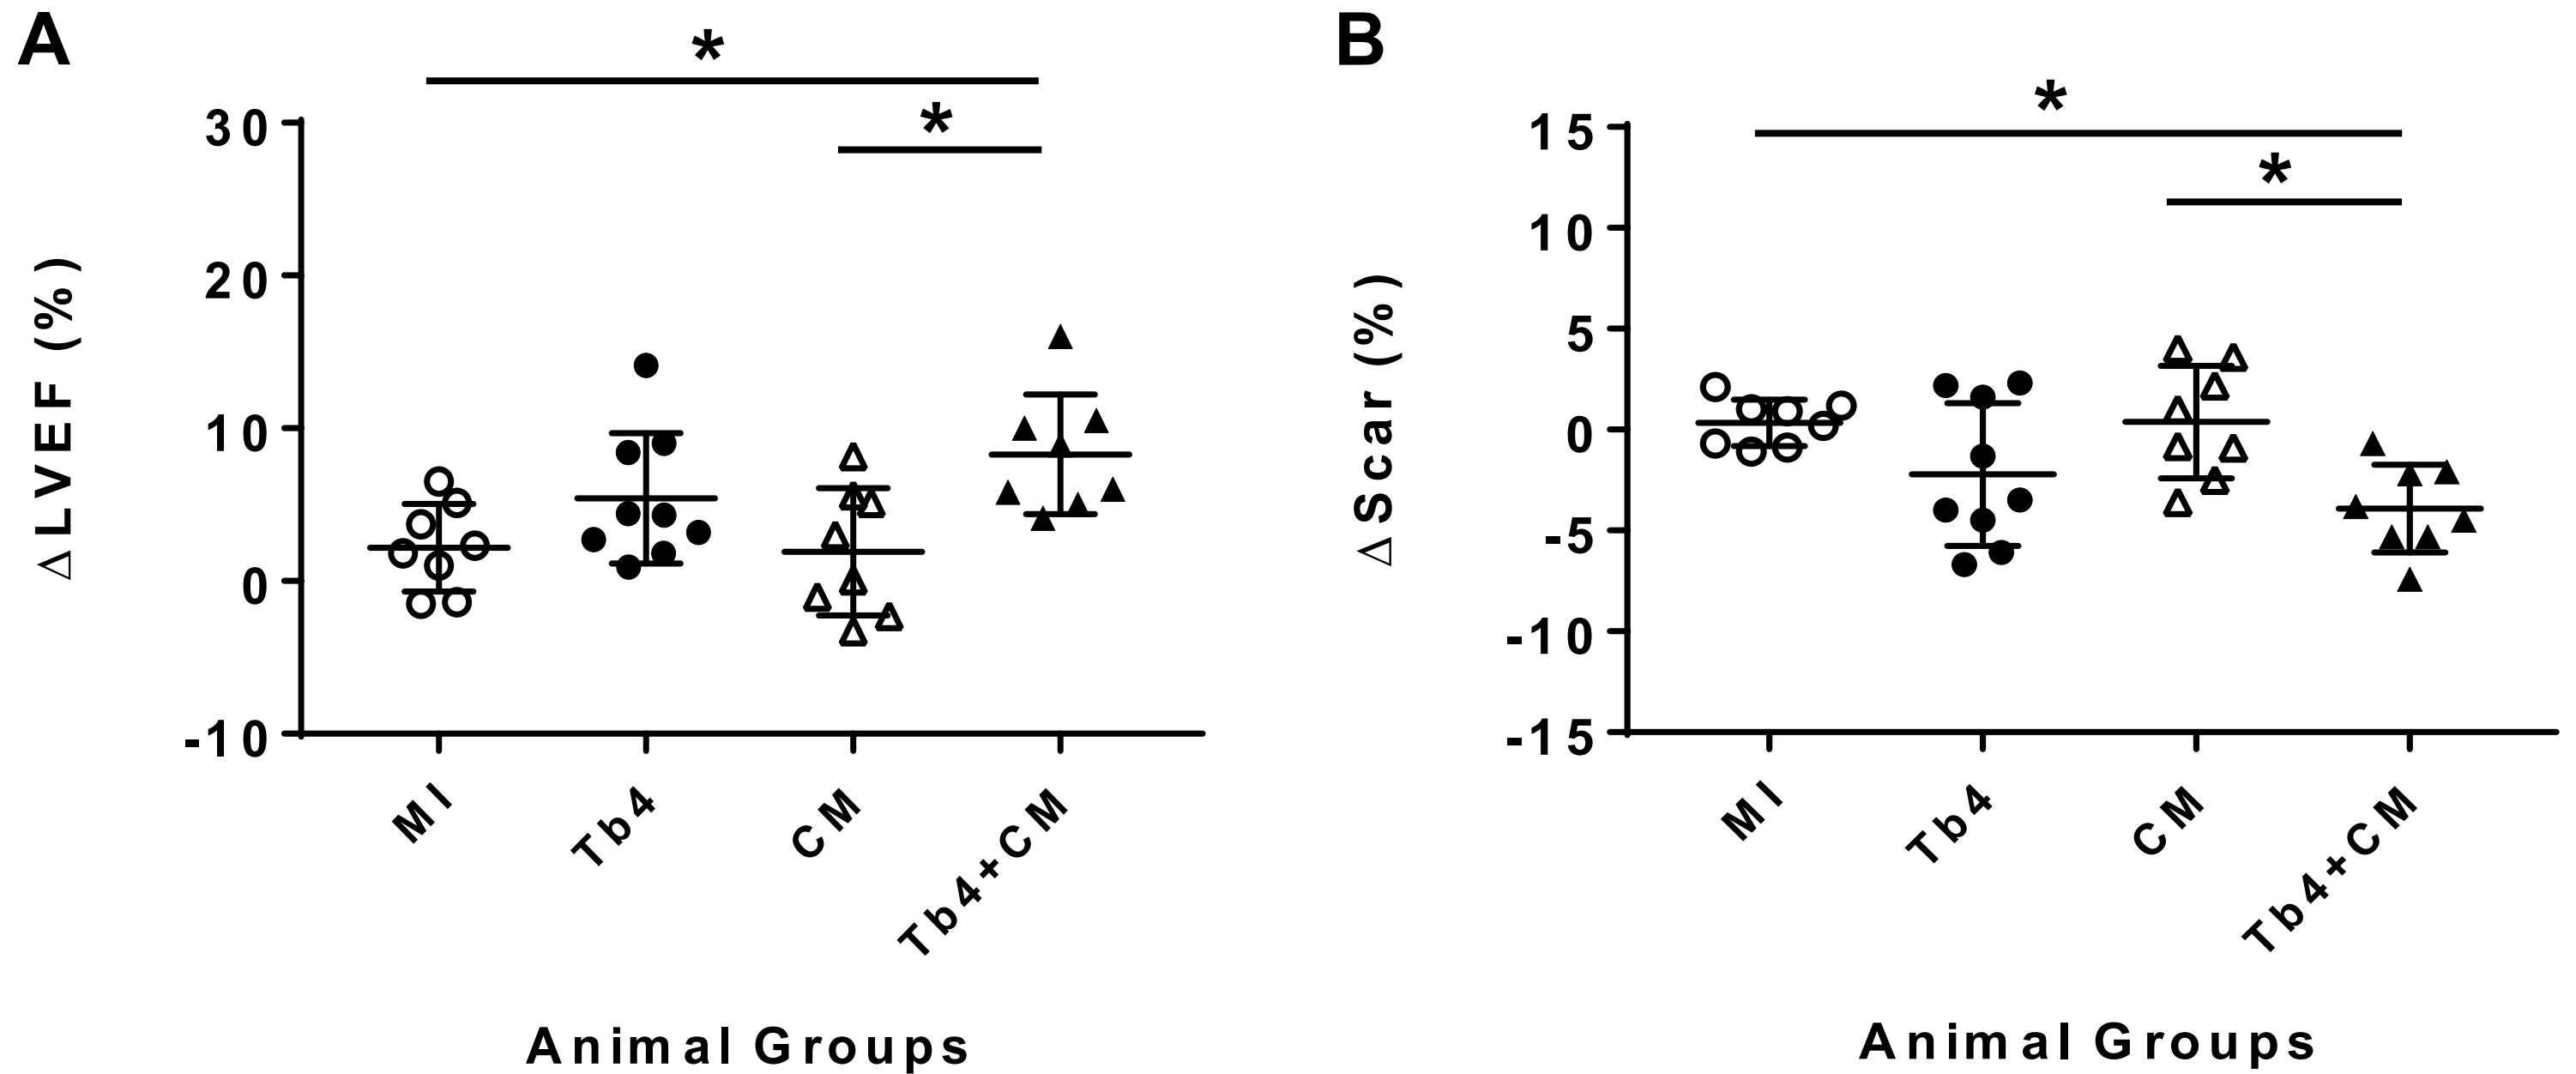

**Figure S6. Changes of LVEF ( $\Delta$ LVEF) and scar area ( $\Delta$ scar) in the pig hearts. (A)  $\Delta$ LVEF in each group is calculated by LVEF at week-4 minus LVEF at week-1. (B)  $\Delta$ scar in each group is calculated by scar area at week-4 minus scar area at week-1. (n = 8 - 9 for each group. One-way ANOVA: \*: P < 0.05). Values are presented as the means  $\pm$  SD.**



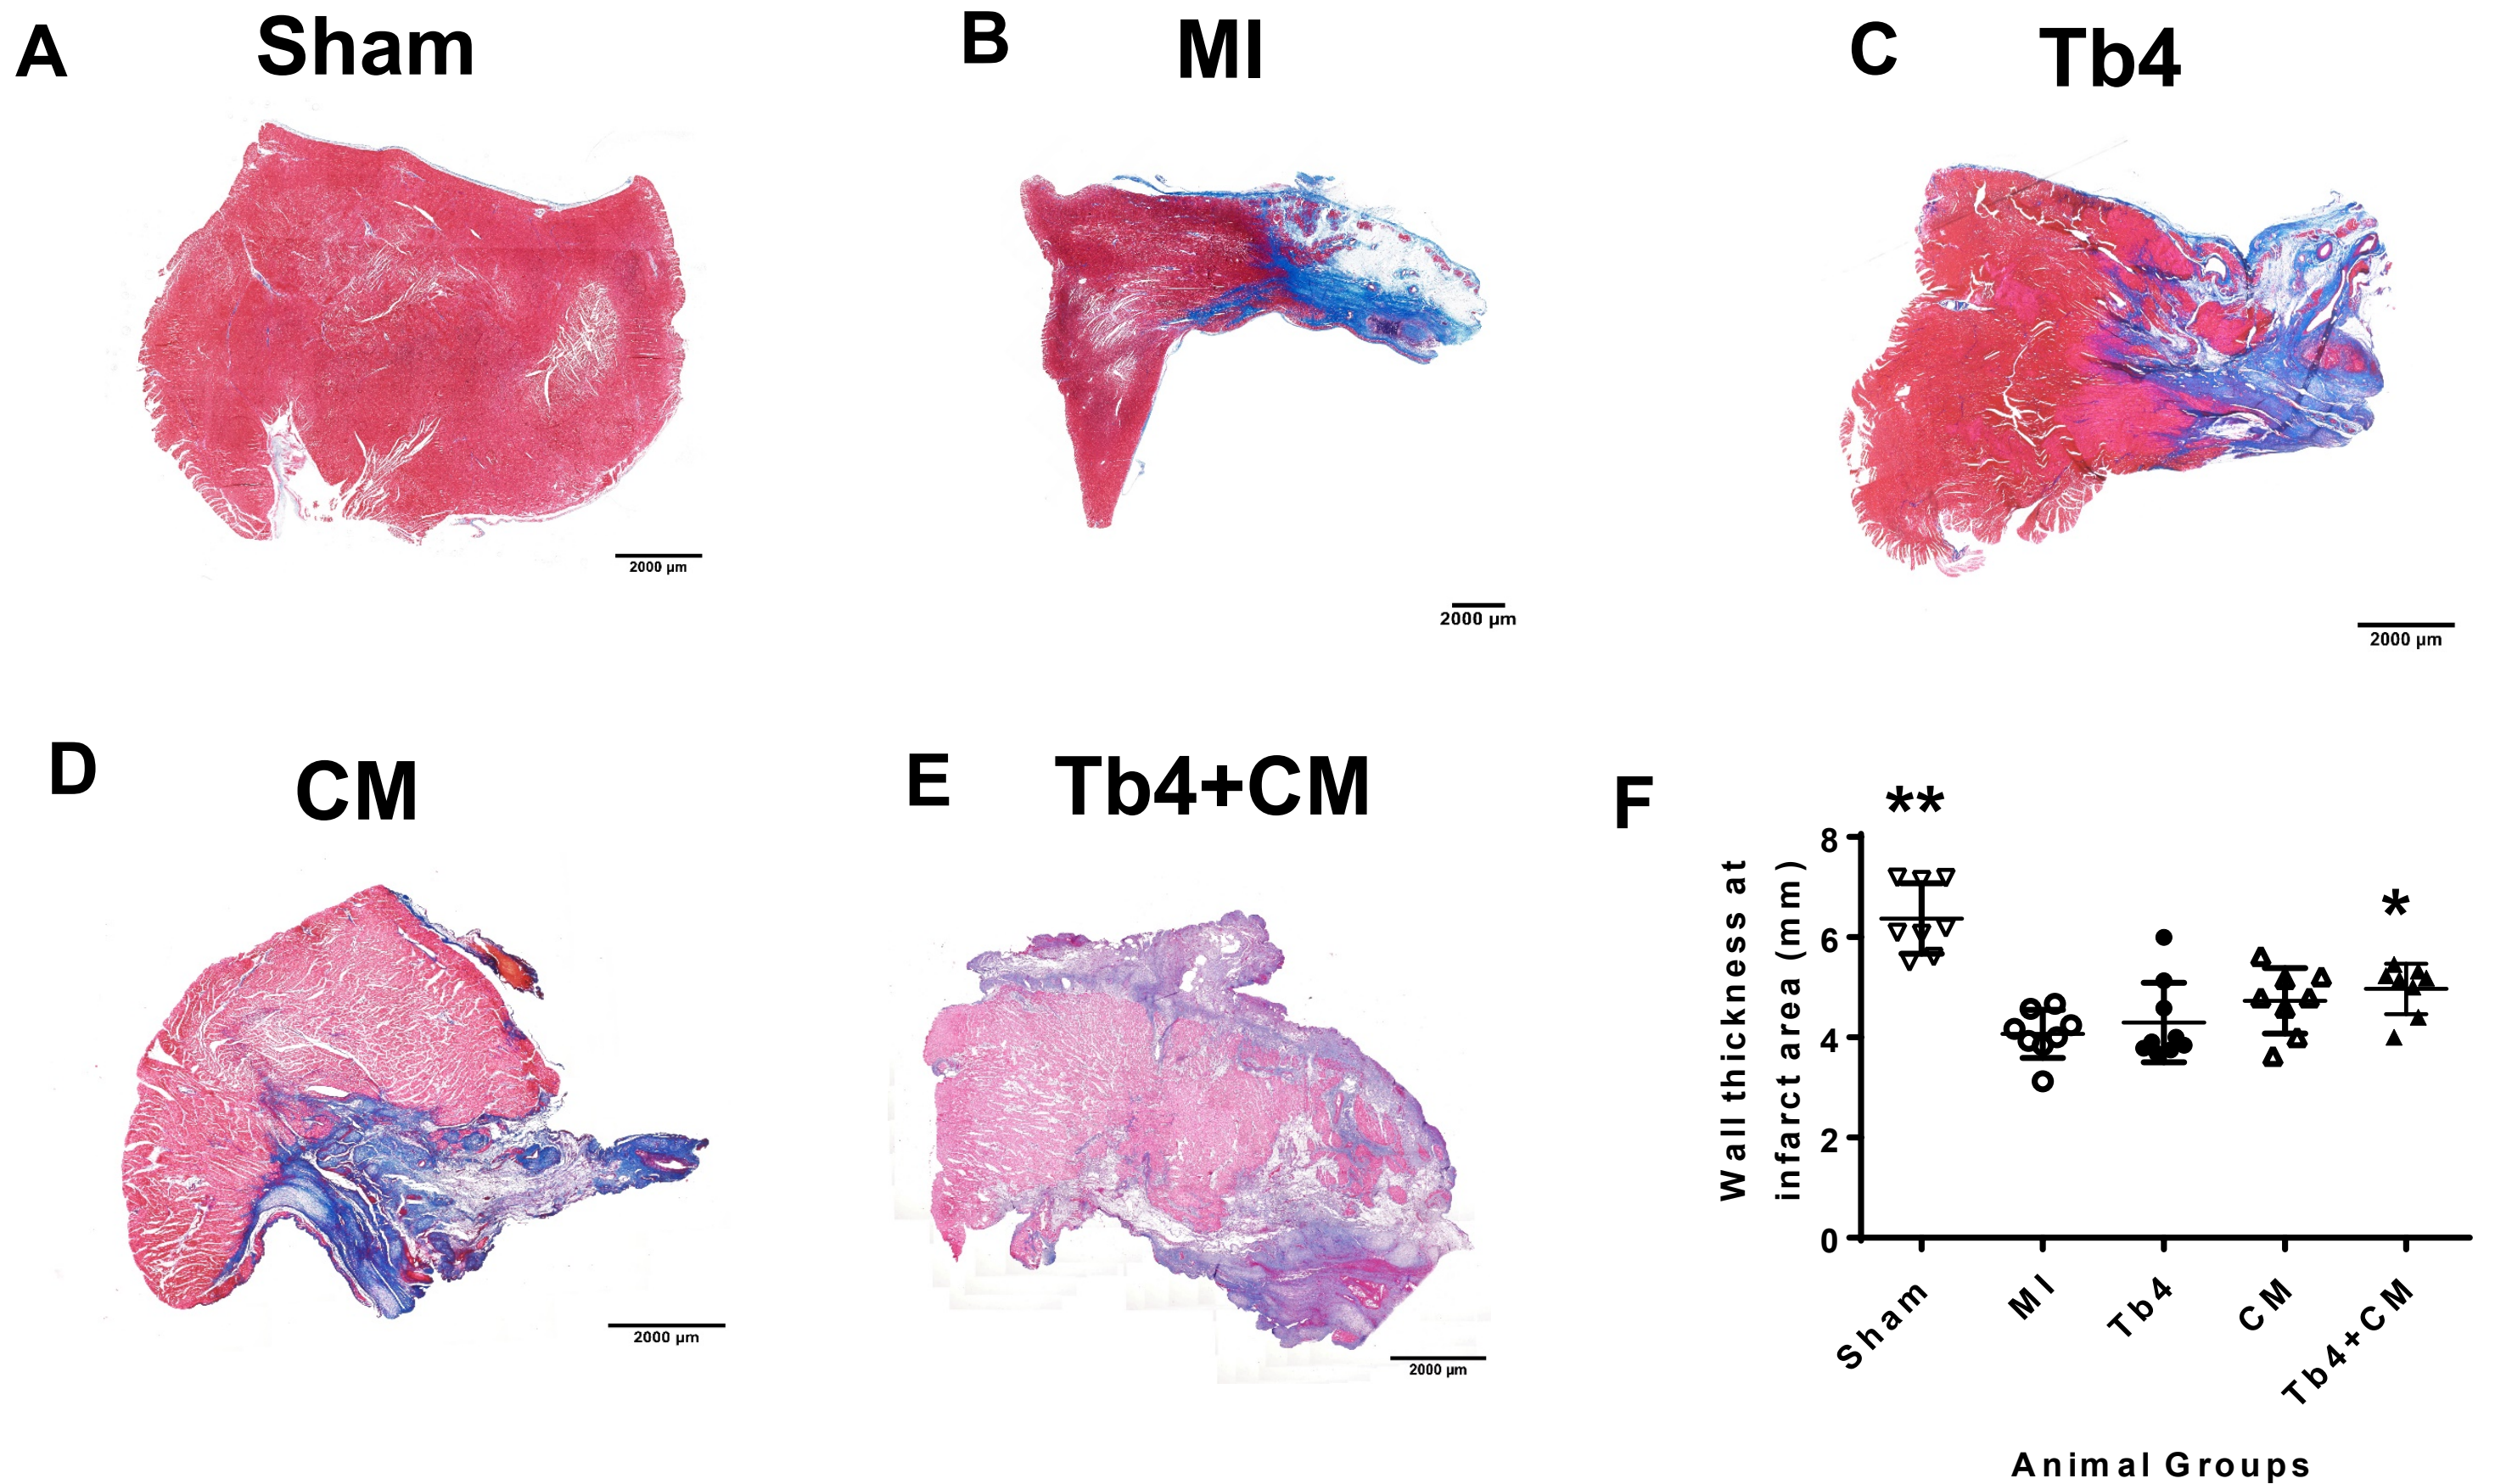

**Figure S7. Macro-images of infarct myocardium in the pig hearts using Masson's Trichrome staining.** Representative images of Masson's Trichrome stained pig heart tissue to visualize scar in the pig hearts of the Sham (A), MI (B), Tb4 (C), CM (D), and Tb4+CM (E) Groups at week-4 after MI and treatment. (F) Quantification of wall thickness at infarct area. (n=8 or 9 for each group. One-way ANOVA. \*\*: P < 0.01 vs every other group; \*: P < 0.05 vs the MI Group). Values are presented as the means  $\pm$  SD. Bar = 2000  $\mu$ m.



**A****Sham**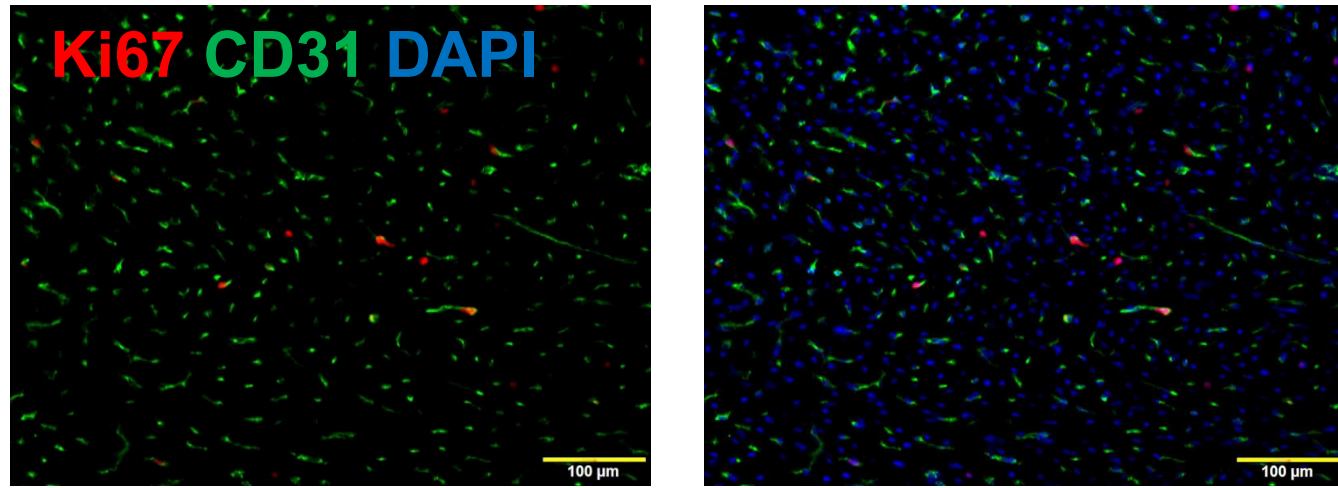**MI**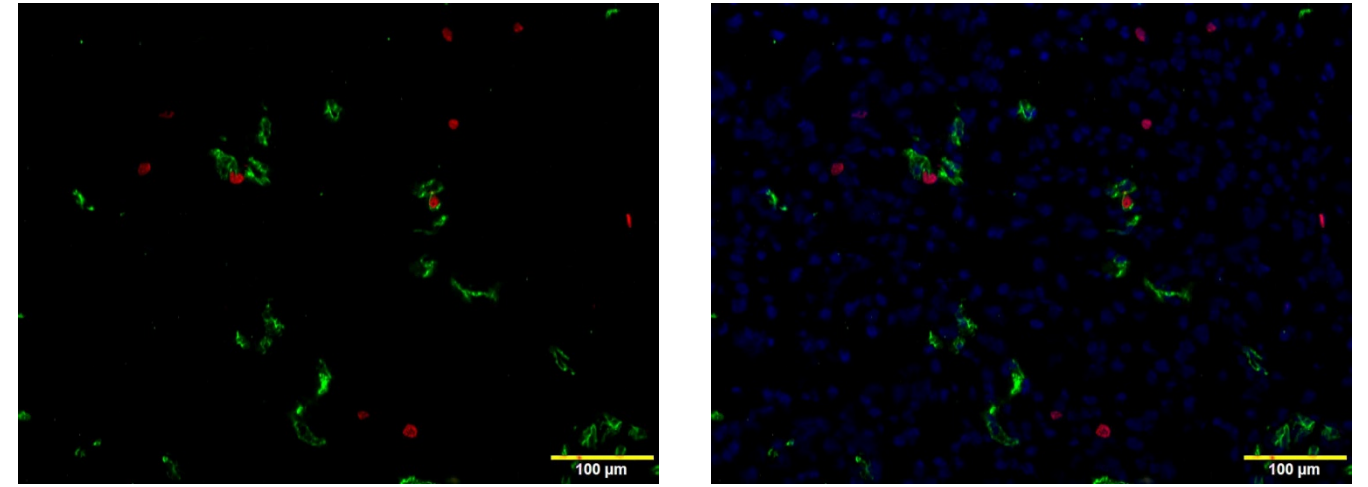**Tb4**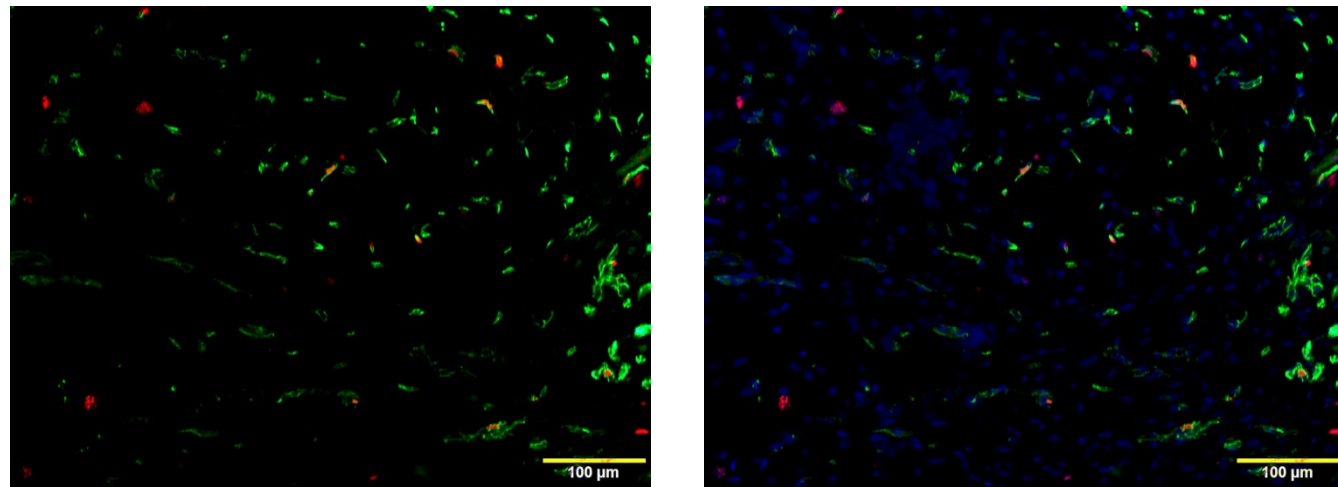**CM**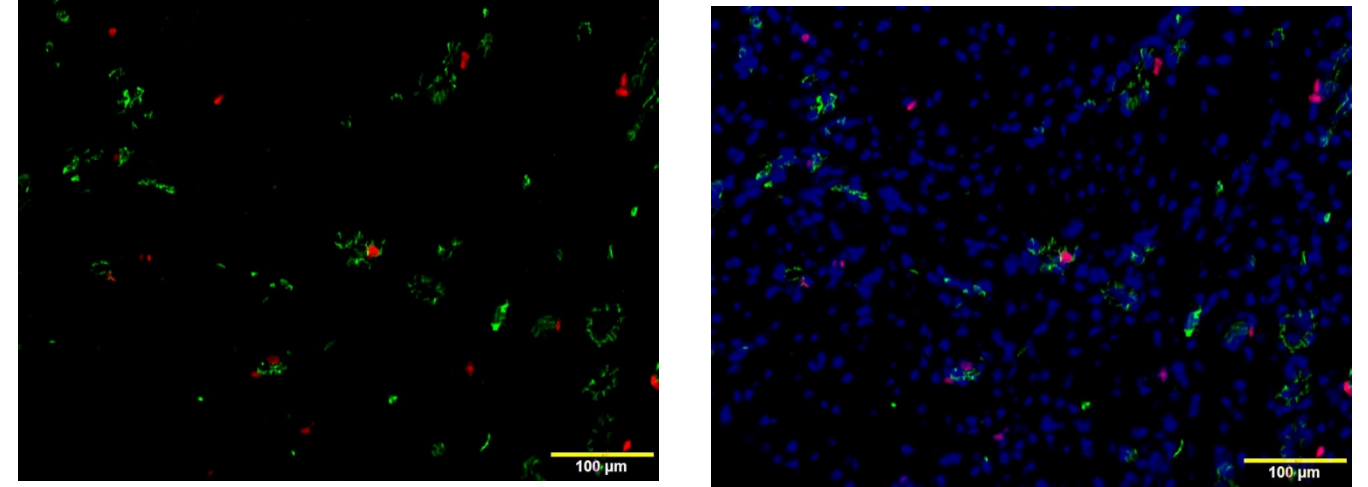**Tb4+CM**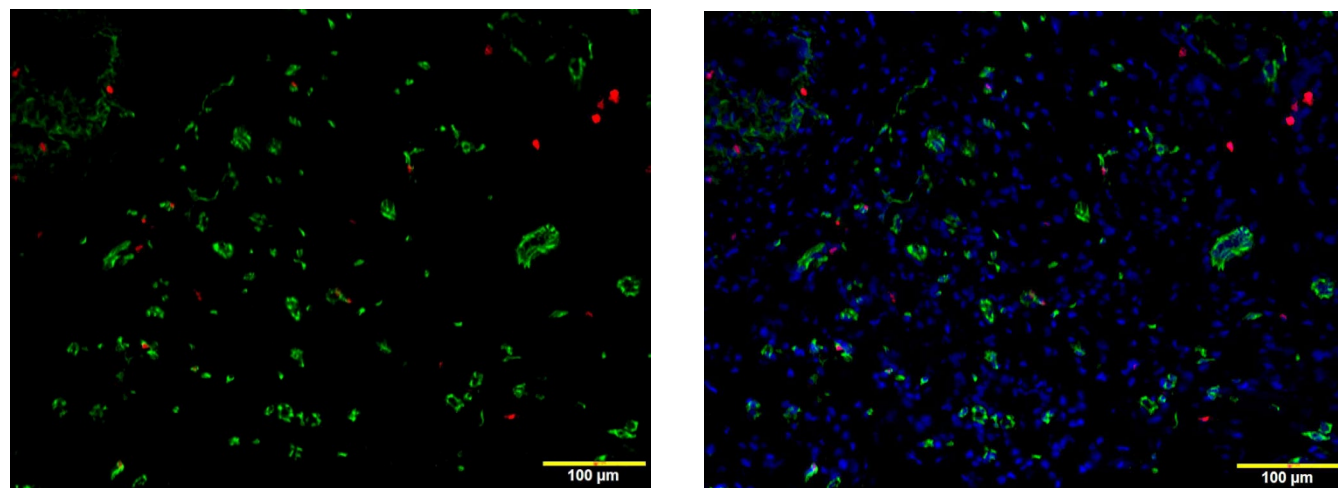**B**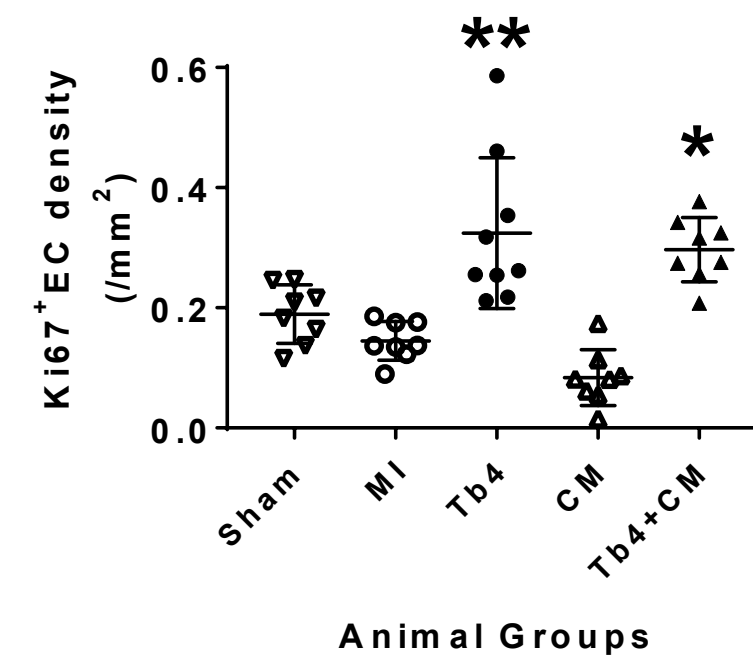

**Figures S8. Proliferation of endothelial cells (ECs) and smooth muscle cells (SMCs) in the pig hearts at week-4 after MI and treatment. (A)** Representative images of Ki67 expressing ECs in the Sham, MI, Tb4, CM, and Tb4 + CM Groups at Week-4 after MI and treatment. **(B)** Quantitative analysis of Ki67<sup>+</sup>ECs in all animal groups. (n = 8 or 9 for each group. One-way ANOVA. \*\*: P < 0.01 vs the Sham, MI, and CM Groups ; \*: P < 0.05 vs the Sham, MI, and CM Groups). Values are presented as the means ± SD. Bar = 100 μm.



**C****Sham**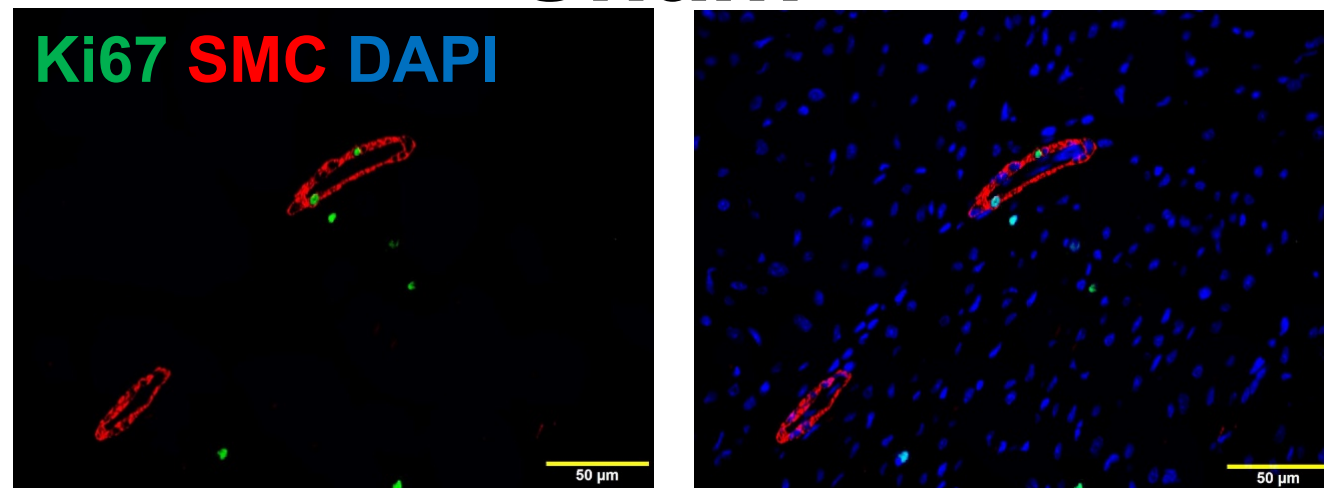**MI**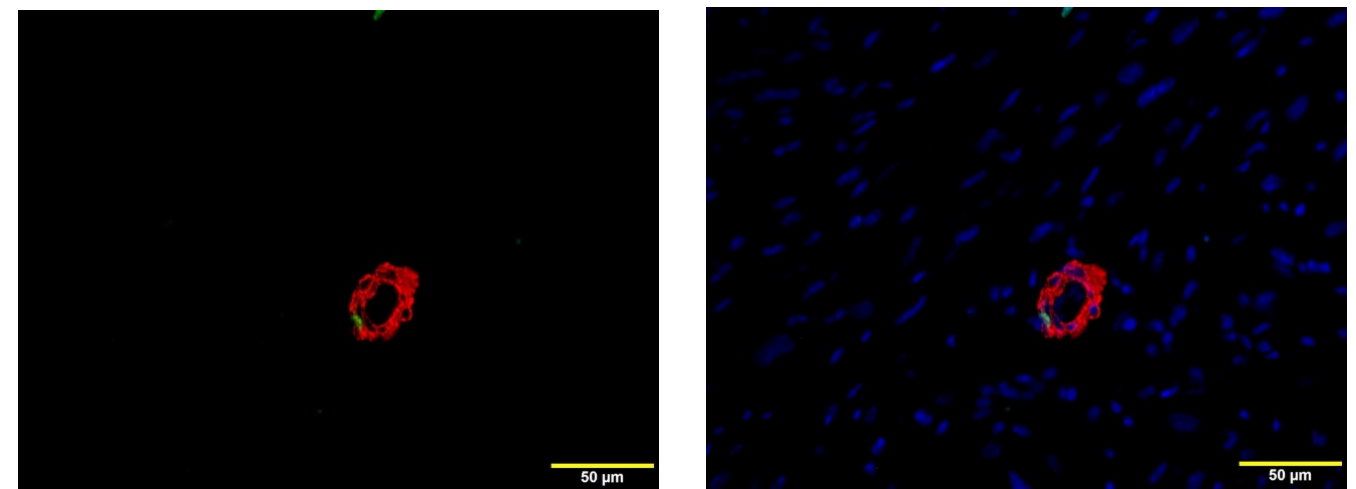**Tb4**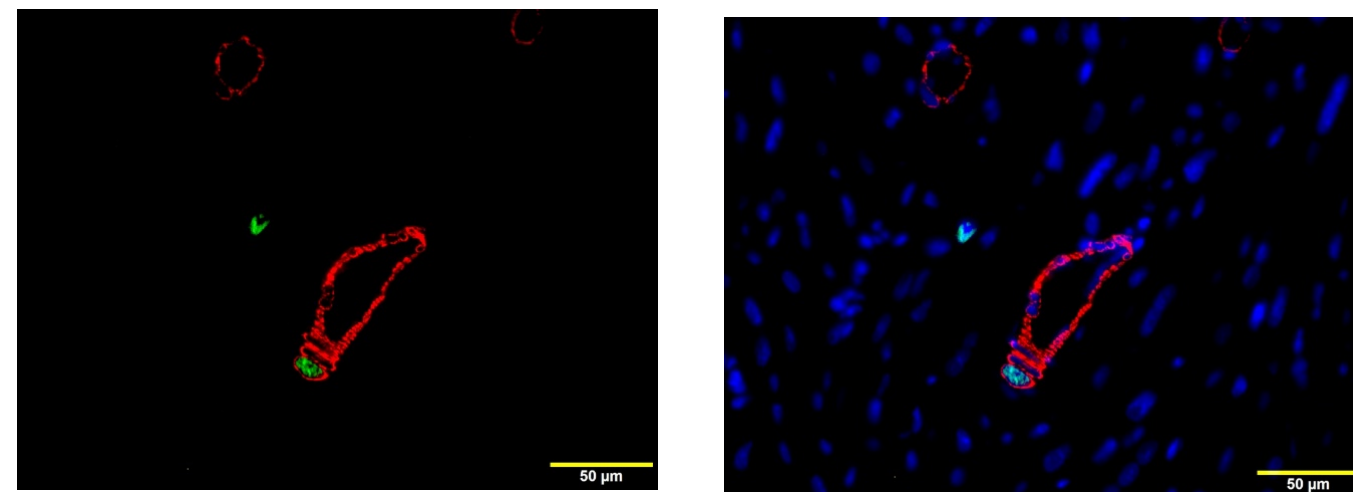**CM**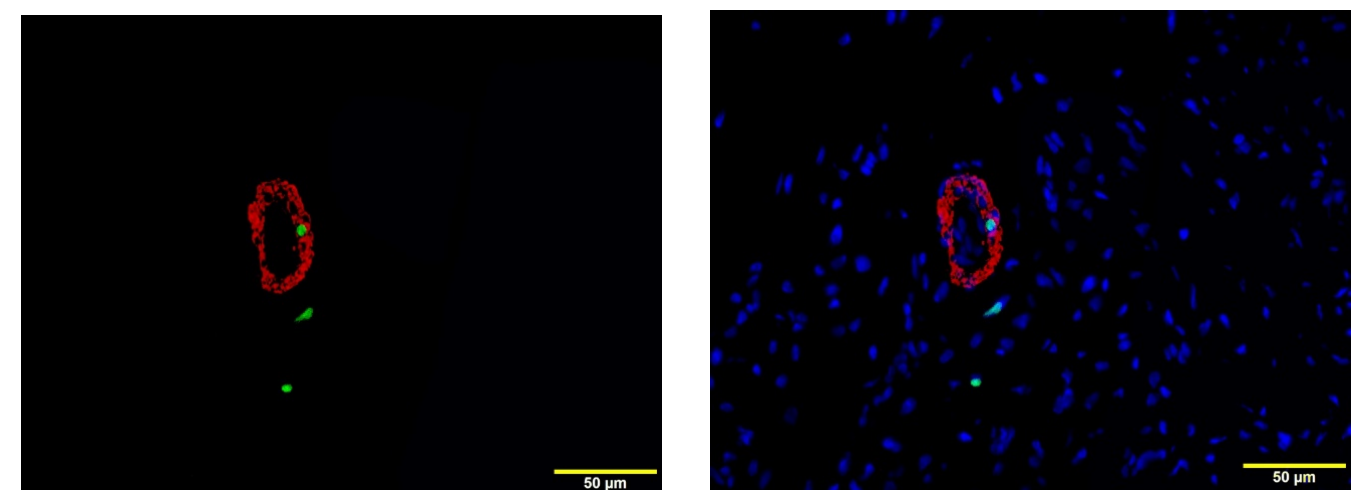**Tb4+CM**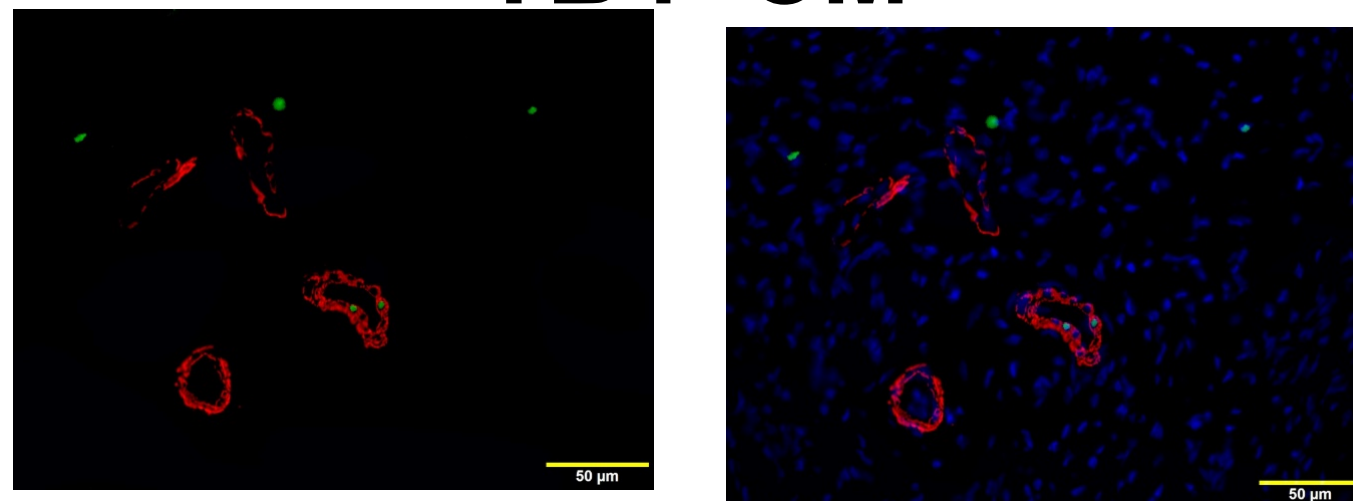**D**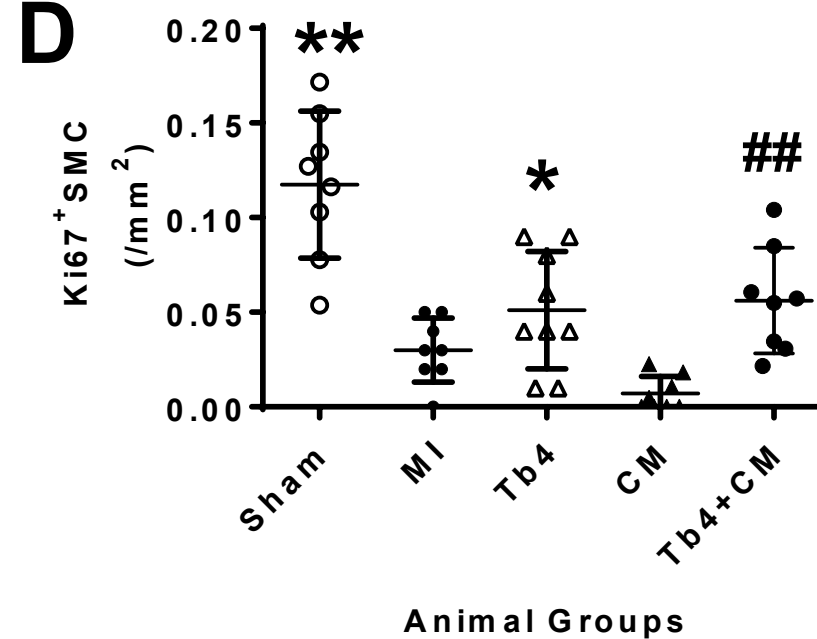

**Figures S8. (C)** Representative images of Ki67 expressing SMCs in the Sham, MI, Tb4, CM, and Tb4 + CM Groups at Week-4 after MI and treatment. **(D)** Quantitative analysis of Ki67<sup>+</sup>SMCs in all animal groups. (n = 8 or 9 for each group. One-way ANOVA. \*\*: P < 0.01 vs every other group; ##: P < 0.01 vs the MI and CM Groups; \*: P < 0.05 vs the CM Group). Values are presented as the means ± SD. Bar = 50 μm.

# Sham

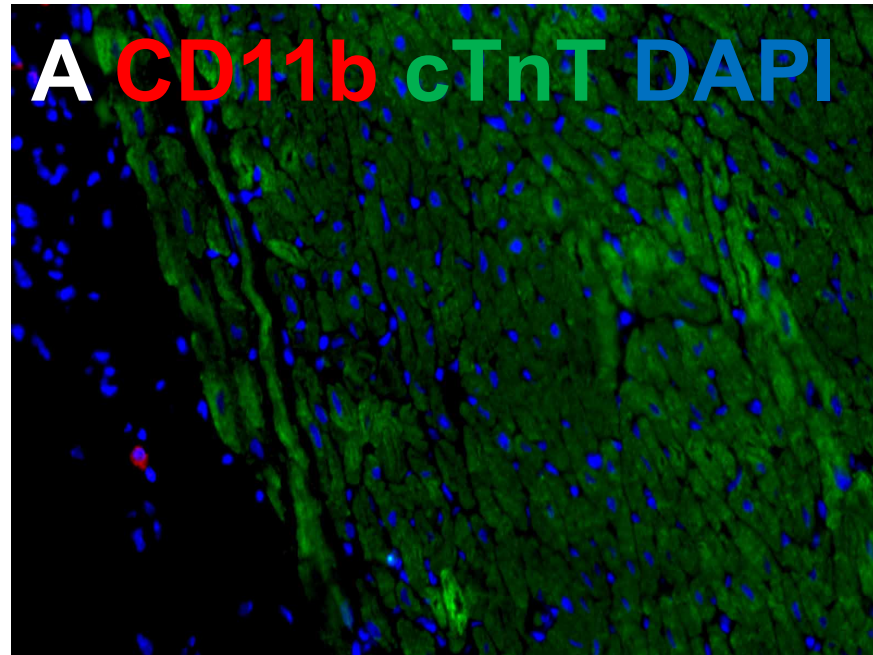

# MI

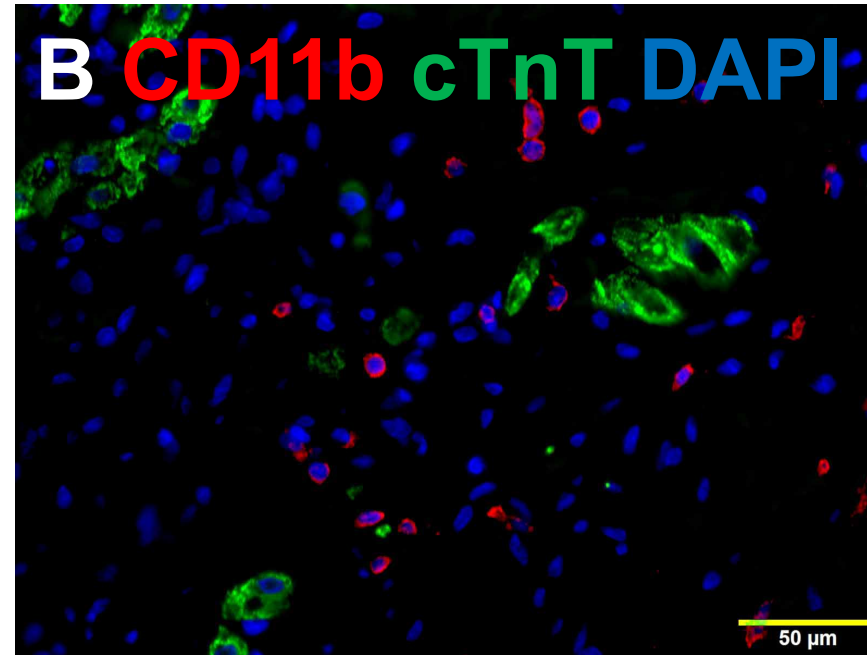

# Tb4

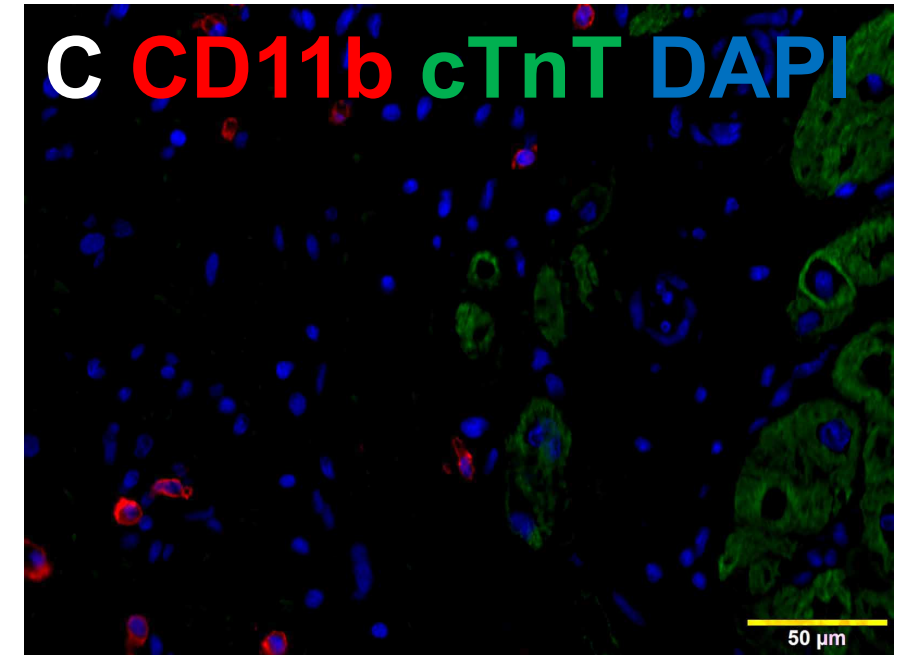

# CM

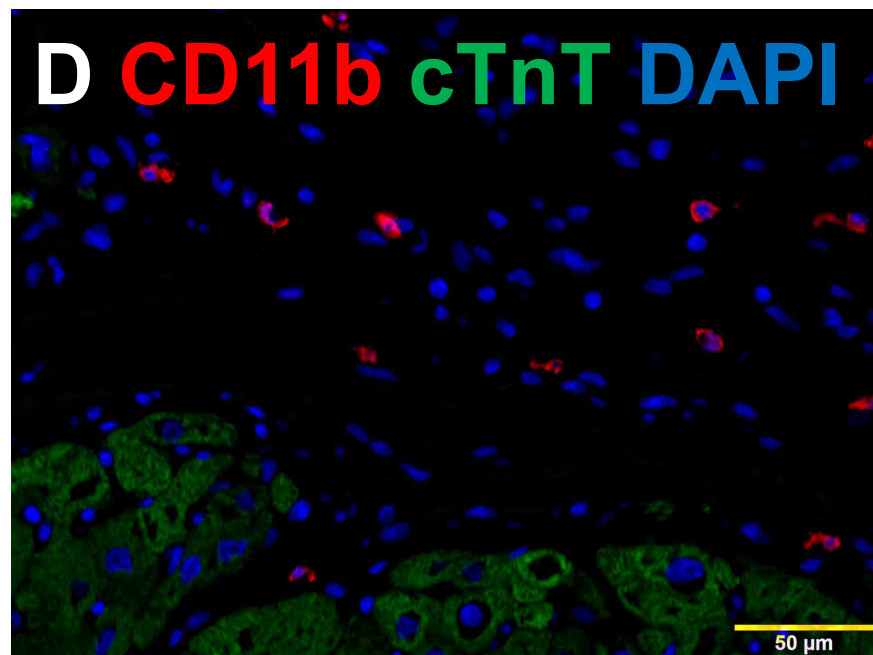

# Tb4 + CM

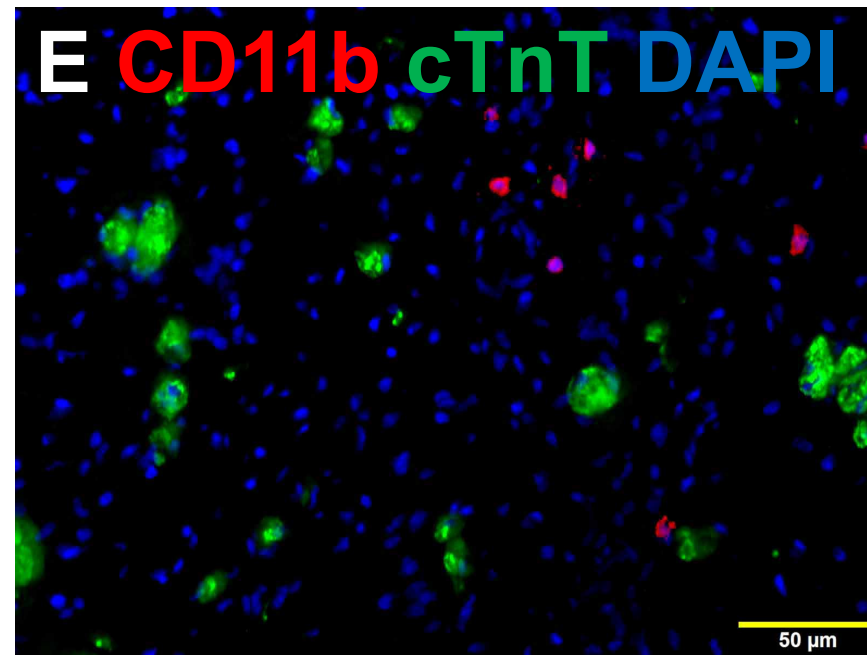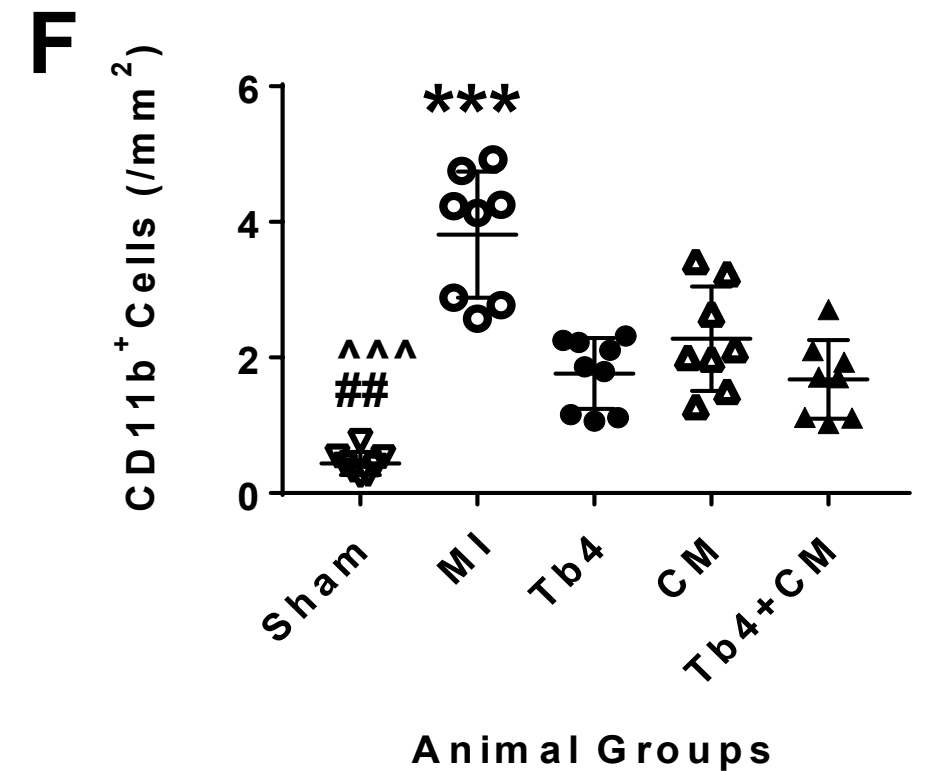

**Figure S9. Fluorescence immunostaining for detecting CD11b<sup>+</sup> cells.** Representative images of CD11b<sup>+</sup> cells in the Sham (A), MI (B), Tb4 (C), CM (D), and Tb4 + CM (E). (F) Quantitative analysis of CD11b<sup>+</sup> cells in all animal groups. (n = 8 or 9 for each group. One-way ANOVA. ^^^: p < 0.001 vs the MI and CM Groups; ##: p < 0.01 vs the Tb4 and Tb4 + CM Groups; \*\*\*: P < 0.001 vs every other group). Values are presented as the means ± SD. Bar = 50 μm.



**Table S1 . Number of animals in each group**

|                 | <b>Sham Group</b> | <b>MI Group</b> | <b>Tb4 Group</b> | <b>hiPSC-CM<br/>Group</b> | <b>Tb4 + hiPSC-CM<br/>Group</b> |
|-----------------|-------------------|-----------------|------------------|---------------------------|---------------------------------|
| <b>4 weeks</b>  | 8                 | 8               | 9                | 8                         | 8                               |
| <b>12 weeks</b> | 0                 | 0               | 0                | 0                         | 6                               |

**Table S2. Human Angiogenesis Array Q2**

|                   | hiPSC-CM | hiPSC-CM + Tb4 |
|-------------------|----------|----------------|
| <b>Activin A</b>  | 30.16    | 21.90          |
| <b>AgRP</b>       | 2.88     | 3.31           |
| <b>Angiogenin</b> | 1.34     | 1.30           |
| <b>ANG-2</b>      | 1.00     | 10.17          |
| <b>ANGPTL4</b>    | 0        | 0              |
| <b>bFGF</b>       | 0        | 22.48          |
| <b>ENA-78</b>     | 17.51    | 2.00           |
| <b>GRO</b>        | 0        | 3.55           |
| <b>HB-EGF</b>     | 0        | 0.35           |
| <b>HGF</b>        | 0        | 0              |
| <b>IFNg</b>       | 0.25     | 0              |
| <b>IGF-I</b>      | 51.46    | 0              |
| <b>IL-1a</b>      | 0        | 0              |
| <b>IL-2</b>       | 3.04     | 1.26           |
| <b>IL-6</b>       | 0.86     | 0              |
| <b>IL-8</b>       | 0        | 0              |
| <b>IL-17</b>      | 0        | 0              |
| <b>IP-10</b>      | 0.29     | 0              |
| <b>Leptin</b>     | 18.66    | 18.45          |
| <b>LIF</b>        | 9.21     | 12.81          |
| <b>MCP-1</b>      | 54.95    | 58.22          |
| <b>PDGF-BB</b>    | 1.62     | 1.28           |
| <b>PIGF</b>       | 0.73     | 2.48           |
| <b>RANTES</b>     | 0        | 0.15           |
| <b>TGFb1</b>      | 0        | 0              |
| <b>TIMP-1</b>     | 7497.31  | 6579.71        |
| <b>TIMP-2</b>     | 3233.89  | 2480.30        |
| <b>TNFa</b>       | 0        | 0              |
| <b>TNFb</b>       | 0        | 0              |
| <b>TPO</b>        | 104.52   | 75.75          |

**Table S3. Human Angiogenesis Array Q3**

|                    | hiPSC-CM | hiPSC-CM + Tb4 |
|--------------------|----------|----------------|
| <b>ANG-1</b>       | 0        | 0              |
| <b>Angiostatin</b> | 4554.59  | 4568.78        |
| <b>CXCL16</b>      | 1.37     | 0              |
| <b>EGF</b>         | 0.12     | 0.05           |
| <b>FGF-4</b>       | 25.98    | 151.24         |
| <b>Follistatin</b> | 7217.05  | 8028.29        |
| <b>G-CSF</b>       | 0        | 0.44           |
| <b>GM-CSF</b>      | 0.37     | 2.07           |
| <b>I-309</b>       | 0        | 0              |
| <b>IL-1b</b>       | 0        | 2.90           |
| <b>IL-4</b>        | 0.28     | 1.16           |
| <b>IL-10</b>       | 0        | 0              |
| <b>IL-12p40</b>    | 9.56     | 10.38          |
| <b>IL-12p70</b>    | 0.20     | 0.47           |
| <b>I-TAC</b>       | 2.23     | 9.41           |
| <b>MCP-2</b>       | 1.41     | 0.33           |
| <b>MCP-3</b>       | 1.39     | 1.46           |
| <b>MCP-4</b>       | 2.00     | 22.86          |
| <b>MMP-1</b>       | 218.17   | 94.03          |
| <b>MMP-9</b>       | 4.61     | 0              |
| <b>PECAM-1</b>     | 25.08    | 2.27           |
| <b>TGFa</b>        | 11.69    | 8.21           |
| <b>TGFb3</b>       | 0.20     | 0.45           |
| <b>Tie-1</b>       | 106.91   | 0              |
| <b>Tie-2</b>       | 0        | 5.25           |
| <b>uPAR</b>        | 309.60   | 197.61         |
| <b>VEGF</b>        | 87.75    | 123.16         |
| <b>VEGF R2</b>     | 7.74     | 2.44           |
| <b>VEGF R3</b>     | 9.35     | 8.19           |
| <b>VEGF-D</b>      | 9.51     | 0              |



**Video-1:** shows the upper abdomen to the pelvis, including part of the liver, small and large intestines, kidneys and urinary bladder at 1 week post cell implantation.

**Video-2:** shows the neck (larynx) to the upper abdomen, including the heart, lung, liver, gallbladder, stomach and part of the large bowel at 1 week post cell implantation.

**Video3:** shows the head (brain) to the upper chest at 1 week post cell implantation.

**Video-4:** shows Sagittal view of the thorax centered at the level of the heart at 1 week post cell implantation.

**Video-5:** shows Head and upper neck including the brain, larynx at 3 months post-cell implantation.

**Video-6:** shows upper neck (larynx) to the upper chest (mediastinum)\_ larynx, lungs, heart at 3 months post-cell implantation.

**Video-7:** shows the upper chest (mediastinum) to the upper abdomen, including the heart, lungs, part of the liver and gallbladder at 3 months post-cell implantation.

**Video-8:** shows the upper abdomen to the abdomen, liver, gallbladder, bowels, kidneys and urinary bladder at 3 months post-cell implantation.

**Video-9:** shows the abdomen to the pelvis - bowels, kidneys and urinary bladder at 3 months post-cell implantation.

**Video-10:** shows the lower pelvis, perineum area with partly visualised urinary bladder, rectum and part of the vagina at 3 months post-cell implantation.
